# Supplementary material
Source: publisher figshare collection journal article supplement (https://brill.figshare.com/ndownloader/files/23925887)
Supplement: Supplementary file 1 [file 23925887]

## Sheet: Family-abstract
Supplementary Table S1. Biomass calculation for different taxa of plant-parasitic nematodes.
Taxon (family or genus)	Female	Male	J4	J3	J2	J1	Cyst	Genera	Species	Populations
Tylenchidae	0.136504	0.0897259						18	79	131		18	79	131
Psilenchidae	0.370635	0.290515						2	8	13		2	8	13
Anguinidae (vermiform genera)	0.204	0.121						2	29	84		2	29	84
Anguinidae (fusiform genera)	23.783	4.69813						2	6	9		2	6	9
Dolichodoridae	3.60402	2.18876						1	6	6		1	6	6
Belonolaimidae	1.82066	0.933948						4	12	23		4	12	23
Merliniidae	0.541923	0.42177						6	52	136		6	52	136
Telotylenchidae	0.250036	0.184741						8	66	85		8	66	85
Pratylenchidae (all)	0.344101	0.25185						10	71	147		10	71	147
Pratylenchidae (common genera)	0.133659	0.0750631						8	56	121		7	96	136
Pratylenchidae (Hirschmanniella)	2.04472	1.36678						1	13	24		6	66	173
Pratylenchidae (Nacobbus)	264.17	0.551209						1	2	2		3	9	9
Hoplolaimidae	1.00122	0.473735						7	96	136		1	25	33
Heteroderinae	39.6117	0.860881			0.554128		67.5913	6	66	173		6	74	138
Ataloderinae	33.229	0.330106			0.112074			3	9	9		8	36	68
Meloidogynidae	88.5657	1.13667			0.0649153			1	25	33		3	67	173
Tylenchulidae (all)	3.95836	0.0341844			0.0482346			6	74	138		2	13	19
Tylenchulidae (Paratylenchus)	0.0493511	0.0253302						1	58	115		10	47	60
Tylenchulidae (Cacopaurus)	0.119069	0.0395563						1	1	3		2	2	3
Tylenchulidae (swollen genera)	5.89544	0.0420847						4	15	20		4	6	7
Criconematidae	0.678455	0.0471042						8	36	68		6	89	167
Hemicycliophoridae	0.647672	0.219044	0.60285	0.193691	0.0788509			3	67	173		4	31	33
Aphelenchidae	0.373268	0.244291						2	13	19		115	890	1653
Aphelenchoididae	0.147004	0.108196						10	47	60
Neotylenchidae	0.184871	0.090125						2	2	3
Sphaerulariidae	0.316371	0.208161						4	6	7
Longidoridae	7.16457	9.32907	2.87766	1.43705	0.652812	0.285489		6	89	167
Trichodoridae	1.08611	0.993424						4	31	33

## Sheet: Family and genera
Taxon (family or genus)	Female	Male	J4	J3	J2	J1	Mature female	Cyst	Species number	populations number
Aphelenchus	0.2777	0.194124							5	11
Paraphelenchus	0.468836	0.294458							8	8
Aphelenchidae	0.373268	0.244291							13	19
Cactodera	50.3479	0.783138			0.088395			61.7247	11	20
Dolichodera	5.10204				0.157253			17.5767	1	1
Globodera	52.9662	0.709592			0.129593			95.8916	10	24
Heterodera	58.7833	0.52113			0.119286			90.4255	40	123
Paradolichodera	30.8632	1.48474			2.60811			75.1484	1	1
Punctodera	39.6075	0.805806			0.222129			64.7808	3	5
Heteroderinae	39.6117	0.860881			0.554128			67.5913	66	173
Belonolaimus	2.5746	0.956364							4	15
Ibipora	3.07884	1.80708							1	1
Meiodorus	0.444053	0.277884							2	2
Morulaimus	1.18515	0.694463							5	5
Belonolaimidae	1.82066	0.933948							12	23
Amplimerlinius	0.724954	0.575912							7	17
Geocenamus	0.483975	0.34752							11	19
Merlinius	0.181343	0.170503							12	25
Nagelus	0.338922	0.394531							2	5
Paramerlinius	1.19879	0.817093							2	5
Pratylenchoides	0.323553	0.22506	0.167628	0.0773836	0.0480409				18	42
Merliniidae	0.541923	0.42177							52	136
Anguina	31.0904	5.98295			0.0619619				5	8
Ditylenchus	0.203874	0.120528							28	83
Pseudhalenchus	0.0744968								1	1
Subanguina	16.4757	3.41331							1	1
Anguinidae	23.783	4.69813							35	93
Deladenus	0.206641	0.069083							1	1
Gymnotylenchus	0.163101	0.111167							1	2
Neotylenchidae	0.184871	0.090125							2	3
Abursanema	0.195321	0.0954577							1	1
Paurodontella	0.215843	0.142237							1	1
Prothalonema	0.567173	0.462427							3	4
Veleshkinema	0.287148	0.132523							1	1
Sphaerulariidae	0.316371	0.208161							6	7
Criconema	0.543983								5	9
Criconemoides	0.649659	0.059968							7	15
Crossonema	1.40875								4	4
Hemicriconemoides	0.231237								2	2
Mesocriconema	0.532701								12	31
Lobocriconema	0.864066								1	1
Ogma	1.05625								4	4
Xenocriconemella	0.140999	0.0342403							1	2
Criconematidae	0.678455	0.0471042							36	68
Antarctylus	0.523313	0.430279							1	1
Helicotylenchus	0.337557	0.190463	0.209077	0.113274	0.0424577				37	66
Hoplolaimus	2.45546	1.5119			0.0661651				7	9
Peltamigratus	0.328161	0.223967							1	1
Rotylenchulus	2.02047	0.0628558							9	11
Rotylenchus	0.937703	0.584804							28	34
Scutellonema	0.405875	0.311869							13	14
Hoplolaimidae	1.00122	0.473735							96	136
Australodorus	7.31499	5.80686	3.3994	1.35091	0.638496	0.165152			1	1
Californidorus	3.79835	3.25044	1.93335	0.980544	0.468761	0.233534			4	8
Longidorus	11.6089	10.0558	6.85869	3.17751	1.34013	0.613295			26	59
Paralongidorus	12.0929	22.5937	1.25496	1.0448	0.584766	0.245757			6	9
Xiphidorus	3.47409		2.13204	1.09488	0.357025	0.154147			3	6
Xiphinema	4.69823	4.93854	1.6875	0.973647	0.527691	0.30105			49	84
Longidoridae	7.16457	9.32907	2.87766	1.43705	0.652812	0.285489			89	167
Meloidogyne	88.5657	1.13667			0.0649153				25	33
Meloidogynidae	88.5657	1.13667			0.0649153				25	33
Allotrichodorus	0.597917	0.604227							4	4
Monotrichodorus	0.620059	0.513393							2	2
Paratrichodorus	1.39678	1.49796							9	10
Trichodorus	1.72968	1.35812							16	17
Trichodoridae	1.08611	0.993424							31	33
Apratylenchoides	0.125698	0.0898527							2	2
Apratylenchus	0.112031	0.0705528							1	2
Aschlysiella	0.108641	0.0486694					3.9792		3	3
Hirschmanniella	2.04472	1.36678							13	24
Hoplotylus	0.162014	0.0479005							4	10
Nacobbus	0.327019	0.551209					264.17		2	2
Pratylenchus	0.118606	0.0725417							31	77
Radopholus	0.182303	0.115468							10	13
Zygotylenchus	0.147661	0.0961835							3	12
Zygradus	0.112321	0.0593359							2	2
Pratylenchidae	0.344101	0.25185							71	147
Aglenchus	0.109093	0.0766078							2	3
Basiria	0.175565	0.0965176							4	5
Boleodorus	0.100179	0.0600022							2	6
Cephalenchus	0.0887455	0.0614221							3	3
Coslenchus	0.104492	0.0718813							15	24
Discopersicus	0.150287	0.0911344							1	2
Discotylenchus	0.0770662	0.0448676							5	5
Ecphyadophora	0.0295778	0.0189336							1	1
Eutylenchus	0.282623								1	1
Filenchus	0.0972633	0.0725542							25	48
Irantylenchus	0.356312	0.306633							1	5
Labrys	0.0470599	0.0472383							1	1
Lelenchus	0.0389212	0.0350532							2	4
Melnchus	0.0770246	0.0572873							6	6
Neopsilenchus	0.252658	0.118832							2	4
Neothada	0.128231	0.111633							1	1
Sakia	0.0333229	0.0154923							1	2
Tylenchus	0.308657	0.239251							6	10
Tylenchidae	0.136504	0.0897259							79	131
Atetylenchus	0.450919	0.35129							3	3
Psilenchus	0.29035	0.229739							5	10
Psilenchidae	0.370635	0.290515							8	13
Aphelenchoides	0.135306	0.0704295							20	30
Aprutides	0.0900905								1	3
Bursaphelenchus	0.146761	0.0915338							2	2
Devibursaphelenchus	0.0686722	0.0483186							1	1
Ektaphelenchoides	0.149017	0.0807842							9	10
Ektaphelenchus	0.135309								1	1
Laimaphelenchus	0.192425	0.156296							4	4
Schistonchus	0.0548077	0.0493594							1	1
Seinura	0.156513	0.105102							7	7
Sheraphelenchus	0.341139	0.263745							1	1
Aphelenchoididae	0.147004	0.108196							47	60
Atalodera	49.7629	0.526232			0.0869336				3	3
Cryphodera	12.8095	0.244462			0.104137				3	3
Meloidodera	37.1145	0.219625			0.114248				3	3
Ataloderinae	33.229	0.330106			0.112074				9	9
Dolichodorus	3.60402	2.18876							6	6
Dolichodoridae	3.60402	2.18876							6	6
Histotylenchus	0.462937	0.403279							2	2
Neodolichorhynchus	0.347124	0.231209							7	7
Paratrophurus	0.191909	0.17321							6	8
Quinisulcius	0.173654	0.106758							6	6
Telotylenchus	0.177812	0.105582							3	3
Trichotylenchus	0.148362	0.129736							4	4
Trophurus	0.222044	0.115338							7	8
Tylenchorhynchus	0.276445	0.212812							31	47
Telotylenchidae	0.250036	0.184741							66	85
Caloosia	0.605605	0.249365							7	10
Hemicaloosia	0.458719	0.122724							8	16
Hemicycliophora	0.878693	0.285043	0.60285	0.193691	0.0788509				52	147
Hemicycliophoridae	0.647672	0.219044	0.60285	0.193691	0.0788509				67	173
Cacopaurus	0.119069	0.0114375	0.0449963						1	3
Meloidoderita	12.0061	0.0395563			0.0562373				4	4
Paratylenchus	0.0493511	0.0253302	0.0455116	0.0341363	0.0185654				58	115
Sphaeronema	10.1573	0.0420818			0.0876582				3	5
Trophotylenchulus	0.402481	0.054802			0.0463683				4	5
Tylenchulus	1.01589	0.0318989			0.0323438				4	6
Tylenchulidae (all)	3.95836	0.0341844			0.0482346				74	138
Tylenchulidae (vermiform-Para)	0.0493511
Tylenchulidae (obese-Caco)	0.119069
Tylenchulidae (swollen-other)	5.89544

## Sheet: Hemicycliophoridae
Source	Family	Genus	Species	L	a	Life stage	Wfresh	Wdry
Chitambar & Subbotin (2014)	Hemicycliophoridae	Caloosia	exigua	467	19.5	F	0.167402	0.0174098
Chitambar & Subbotin (2014)	Hemicycliophoridae	Caloosia	exilis	1135	32	F	0.892417	0.0928113
Chitambar & Subbotin (2014)	Hemicycliophoridae	Caloosia	longicaudata	860	30	F	0.441706	0.0459374
Chitambar & Subbotin (2014)	Hemicycliophoridae	Caloosia	longicaudata	943	24.9	F	0.845311	0.0879123
Chitambar & Subbotin (2014)	Hemicycliophoridae	Caloosia	parlona	950	22.4	F	1.06796	0.111068
Chitambar & Subbotin (2014)	Hemicycliophoridae	Caloosia	paxi	820	28	F	0.439547	0.0457129
Chitambar & Subbotin (2014)	Hemicycliophoridae	Caloosia	paxi	855	26.1	F	0.573452	0.059639
Chitambar & Subbotin (2014)	Hemicycliophoridae	Caloosia	paxi	815	25	F	0.541343	0.0562997
Chitambar & Subbotin (2014)	Hemicycliophoridae	Caloosia	peculiaris	638	18.4	F	0.479409	0.0498586
Chitambar & Subbotin (2014)	Hemicycliophoridae	Caloosia	triannulata	1080	36	F	0.6075	0.06318
Chitambar & Subbotin (2014)	Hemicycliophoridae	Hemicaloosia	americanae	790	29	F	0.366408	0.0381065
Chitambar & Subbotin (2014)	Hemicycliophoridae	Hemicaloosia	delpradi	800	26	F	0.473373	0.0492308
Chitambar & Subbotin (2014)	Hemicycliophoridae	Hemicaloosia	langola	750	22.1	F	0.539858	0.0561452
Chitambar & Subbotin (2014)	Hemicycliophoridae	Hemicaloosia	luci	970	34	F	0.493443	0.0513181
Chitambar & Subbotin (2014)	Hemicycliophoridae	Hemicaloosia	luci	720	31.3	F	0.238116	0.0247641
Chitambar & Subbotin (2014)	Hemicycliophoridae	Hemicaloosia	nudata	990	29	F	0.72109	0.0749934
Chitambar & Subbotin (2014)	Hemicycliophoridae	Hemicaloosia	paradoxa	670	26	F	0.278072	0.0289195
Chitambar & Subbotin (2014)	Hemicycliophoridae	Hemicaloosia	paradoxa	620	29	F	0.177117	0.0184201
Chitambar & Subbotin (2014)	Hemicycliophoridae	Hemicaloosia	paradoxa	590	25	F	0.205379	0.0213594
Chitambar & Subbotin (2014)	Hemicycliophoridae	Hemicaloosia	uarki	1244	30.5	F	1.29343	0.134516
Chitambar & Subbotin (2014)	Hemicycliophoridae	Hemicaloosia	uarki	1274	34.2	F	1.10493	0.114913
Chitambar & Subbotin (2014)	Hemicycliophoridae	Hemicaloosia	vagisclera	700	27.4	F	0.285544	0.0296966
Chitambar & Subbotin (2014)	Hemicycliophoridae	Hemicaloosia	vagisclera	772	29.6	F	0.328207	0.0341336
Chitambar & Subbotin (2014)	Hemicycliophoridae	Hemicaloosia	vagisclera	745	29.7	F	0.292979	0.0304698
Chitambar & Subbotin (2014)	Hemicycliophoridae	Hemicaloosia	vagisclera	712	28.8	F	0.271979	0.0282858
Chitambar & Subbotin (2014)	Hemicycliophoridae	Hemicaloosia	vagisclera	700	28.2	F	0.269573	0.0280356
Chitambar & Subbotin (2014)	Hemicycliophoridae	Hemicycliophora	aberrans	950	27	F	0.735061	0.0764463
Chitambar & Subbotin (2014)	Hemicycliophoridae	Hemicycliophora	amchitkaensis	1269	27.5	F	1.68888	0.175644
Chitambar & Subbotin (2014)	Hemicycliophoridae	Hemicycliophora	andrassyi	850	26	F	0.567793	0.0590505
Chitambar & Subbotin (2014)	Hemicycliophoridae	Hemicycliophora	andrassyi	1000	28	F	0.797194	0.0829082
Chitambar & Subbotin (2014)	Hemicycliophoridae	Hemicycliophora	andrassyi	1000	24.9	F	1.00805	0.104837
Chitambar & Subbotin (2014)	Hemicycliophoridae	Hemicycliophora	andrassyi	930	30	F	0.558581	0.0580924
Chitambar & Subbotin (2014)	Hemicycliophoridae	Hemicycliophora	andrassyi	916	27	F	0.658929	0.0685287
Chitambar & Subbotin (2014)	Hemicycliophoridae	Hemicycliophora	aquatica	1300	25.7	F	2.07895	0.216211
Chitambar & Subbotin (2014)	Hemicycliophoridae	Hemicycliophora	arenaria	750	24	F	0.457764	0.0476074
Chitambar & Subbotin (2014)	Hemicycliophoridae	Hemicycliophora	arenaria	813	23	F	0.634886	0.0660282
Chitambar & Subbotin (2014)	Hemicycliophoridae	Hemicycliophora	arenaria	740	23	F	0.478762	0.0497912
Chitambar & Subbotin (2014)	Hemicycliophoridae	Hemicycliophora	armandae	980	21	F	1.33389	0.138724
Chitambar & Subbotin (2014)	Hemicycliophoridae	Hemicycliophora	attapadii	1011	36.7	F	0.479514	0.0498695
Chitambar & Subbotin (2014)	Hemicycliophoridae	Hemicycliophora	belemnis	910	19.9	F	1.18932	0.123689
Chitambar & Subbotin (2014)	Hemicycliophoridae	Hemicycliophora	belemnis	950	26.9	F	0.740536	0.0770158
Chitambar & Subbotin (2014)	Hemicycliophoridae	Hemicycliophora	belemnis	830	19.3	F	0.9594	0.0997776
Chitambar & Subbotin (2014)	Hemicycliophoridae	Hemicycliophora	belemnis	760	28.4	F	0.340161	0.0353767
Chitambar & Subbotin (2014)	Hemicycliophoridae	Hemicycliophora	belemnis	829	23	F	0.673113	0.0700037
Ghaderi et al. (2018)	Hemicycliophoridae	Hemicycliophora	belemnis	829	23	F	0.673113	0.0700037
Ghaderi et al. (2018)	Hemicycliophoridae	Hemicycliophora	belemnis	690	31.6	F	0.205614	0.0213839
Chitambar & Subbotin (2014)	Hemicycliophoridae	Hemicycliophora	biosphaera	924	27.1	F	0.671363	0.0698217
Chitambar & Subbotin (2014)	Hemicycliophoridae	Hemicycliophora	brevicauda	600	19	F	0.373961	0.038892
Chitambar & Subbotin (2014)	Hemicycliophoridae	Hemicycliophora	brzeskii	1230	22	F	2.40298	0.24991
Chitambar & Subbotin (2014)	Hemicycliophoridae	Hemicycliophora	brzeskii	1180	20	F	2.56724	0.266993
Chitambar & Subbotin (2014)	Hemicycliophoridae	Hemicycliophora	brzeskii	1190	22.3	F	2.11793	0.220265
Chitambar & Subbotin (2014)	Hemicycliophoridae	Hemicycliophora	californica	880	26	F	0.630059	0.0655262
Chitambar & Subbotin (2014)	Hemicycliophoridae	Hemicycliophora	californica	850	24	F	0.666368	0.0693023
Chitambar & Subbotin (2014)	Hemicycliophoridae	Hemicycliophora	californica	856	28.6	F	0.479258	0.0498428
Chitambar & Subbotin (2014)	Hemicycliophoridae	Hemicycliophora	catarinensis	980	28	F	0.750313	0.0780325
Chitambar & Subbotin (2014)	Hemicycliophoridae	Hemicycliophora	catarinensis	971	23.2	F	1.06307	0.110559
Chitambar & Subbotin (2014)	Hemicycliophoridae	Hemicycliophora	chathami	1016	25.8	F	0.98474	0.102413
Chitambar & Subbotin (2014)	Hemicycliophoridae	Hemicycliophora	chathami	1113	24.5	F	1.4356	0.149302
Chitambar & Subbotin (2014)	Hemicycliophoridae	Hemicycliophora	chathami	1453	27	F	2.62996	0.273516
Chitambar & Subbotin (2014)	Hemicycliophoridae	Hemicycliophora	chilensis	770	29.5	F	0.327875	0.034099
Chitambar & Subbotin (2014)	Hemicycliophoridae	Hemicycliophora	chilensis	1020	27	F	0.909815	0.0946207
Chitambar & Subbotin (2014)	Hemicycliophoridae	Hemicycliophora	chilensis	878	27	F	0.580278	0.0603489
Brzeski (1998)	Hemicycliophoridae	Hemicycliophora	conida	860	25	F	0.636056	0.0661498
Chitambar & Subbotin (2014)	Hemicycliophoridae	Hemicycliophora	conida	810	24	F	0.57665	0.0599716
Chitambar & Subbotin (2014)	Hemicycliophoridae	Hemicycliophora	conida	840	23	F	0.700265	0.0728275
Chitambar & Subbotin (2014)	Hemicycliophoridae	Hemicycliophora	conida	790	23	F	0.582513	0.0605814
Chitambar & Subbotin (2014)	Hemicycliophoridae	Hemicycliophora	conida	840	23	F	0.700265	0.0728275
Chitambar & Subbotin (2014)	Hemicycliophoridae	Hemicycliophora	conida	940	22	F	1.07255	0.111545
Chitambar & Subbotin (2014)	Hemicycliophoridae	Hemicycliophora	conida	980	28	F	0.750313	0.0780325
Chitambar & Subbotin (2014)	Hemicycliophoridae	Hemicycliophora	conida	817	21	F	0.772872	0.0803787
Chitambar & Subbotin (2014)	Hemicycliophoridae	Hemicycliophora	conida	770	28.6	F	0.348835	0.0362788
Chitambar & Subbotin (2014)	Hemicycliophoridae	Hemicycliophora	conida	836	25.2	F	0.57504	0.0598041
Chitambar & Subbotin (2014)	Hemicycliophoridae	Hemicycliophora	corbettii	900	26	F	0.674001	0.0700962
Chitambar & Subbotin (2014)	Hemicycliophoridae	Hemicycliophora	dahomensis	1050	30.6	F	0.77269	0.0803597
Chitambar & Subbotin (2014)	Hemicycliophoridae	Hemicycliophora	demani	670	24.5	F	0.313164	0.0325691
Chitambar & Subbotin (2014)	Hemicycliophoridae	Hemicycliophora	demani	644	19.8	F	0.425802	0.0442834
Chitambar & Subbotin (2014)	Hemicycliophoridae	Hemicycliophora	demani	694	19.8	F	0.532878	0.0554193
Chitambar & Subbotin (2014)	Hemicycliophoridae	Hemicycliophora	demani	622	17	F	0.520419	0.0541236
Chitambar & Subbotin (2014)	Hemicycliophoridae	Hemicycliophora	demani	650	25	F	0.274625	0.028561
Chitambar & Subbotin (2014)	Hemicycliophoridae	Hemicycliophora	dhanachandi	701	22.6	F	0.421519	0.043838
Chitambar & Subbotin (2014)	Hemicycliophoridae	Hemicycliophora	diolaensis	1070	26.2	F	1.1154	0.116001
Chitambar & Subbotin (2014)	Hemicycliophoridae	Hemicycliophora	diolaensis	1040	27.2	F	0.95026	0.098827
Chitambar & Subbotin (2014)	Hemicycliophoridae	Hemicycliophora	dulli	884	19.5	F	1.13545	0.118087
Brzeski (1998)	Hemicycliophoridae	Hemicycliophora	epicharoides	800	24	F	0.555556	0.0577778
Chitambar & Subbotin (2014)	Hemicycliophoridae	Hemicycliophora	epicharoides	950	21.8	F	1.12756	0.117266
Chitambar & Subbotin (2014)	Hemicycliophoridae	Hemicycliophora	epicharoides	835	19	F	1.00793	0.104825
Chitambar & Subbotin (2014)	Hemicycliophoridae	Hemicycliophora	epicharoides	822	18.7	F	0.992687	0.103239
Chitambar & Subbotin (2014)	Hemicycliophoridae	Hemicycliophora	epicharoides	714	14	F	1.1607	0.120712
Chitambar & Subbotin (2014)	Hemicycliophoridae	Hemicycliophora	eugeniae	1370	40	F	1.00443	0.104461
Chitambar & Subbotin (2014)	Hemicycliophoridae	Hemicycliophora	floridensis	780	19	F	0.821593	0.0854457
Chitambar & Subbotin (2014)	Hemicycliophoridae	Hemicycliophora	floridensis	1050	20	F	1.80879	0.188114
Chitambar & Subbotin (2014)	Hemicycliophoridae	Hemicycliophora	fragilis	900	26	F	0.674001	0.0700962
Chitambar & Subbotin (2014)	Hemicycliophoridae	Hemicycliophora	gigas	1368	28.6	F	1.95617	0.203442
Chitambar & Subbotin (2014)	Hemicycliophoridae	Hemicycliophora	halophila	1130	19.8	F	2.3003	0.239231
Chitambar & Subbotin (2014)	Hemicycliophoridae	Hemicycliophora	halophila	1010	27	F	0.883317	0.091865
Chitambar & Subbotin (2014)	Hemicycliophoridae	Hemicycliophora	halophila	920	19	F	1.34814	0.140207
Chitambar & Subbotin (2014)	Hemicycliophoridae	Hemicycliophora	helenica	1376	29	F	1.93615	0.20136
Chitambar & Subbotin (2014)	Hemicycliophoridae	Hemicycliophora	iberica	829	24.9	F	0.574308	0.059728
Chitambar & Subbotin (2014)	Hemicycliophoridae	Hemicycliophora	iberica	847	25.5	F	0.58405	0.0607412
Chitambar & Subbotin (2014)	Hemicycliophoridae	Hemicycliophora	iberica	882	26.3	F	0.619975	0.0644774
Chitambar & Subbotin (2014)	Hemicycliophoridae	Hemicycliophora	labiata	770	23.7	F	0.50799	0.052831
Chitambar & Subbotin (2014)	Hemicycliophoridae	Hemicycliophora	labiata	680	22.6	F	0.38476	0.040015
Chitambar & Subbotin (2014)	Hemicycliophoridae	Hemicycliophora	labiata	876	23	F	0.794212	0.0825981
Chitambar & Subbotin (2014)	Hemicycliophoridae	Hemicycliophora	lamberti	1247	20.4	F	2.91219	0.302867
Chitambar & Subbotin (2014)	Hemicycliophoridae	Hemicycliophora	lutosa	1070	30	F	0.850724	0.0884753
Chitambar & Subbotin (2014)	Hemicycliophoridae	Hemicycliophora	lutosa	1150	32	F	0.928268	0.0965399
Ghaderi et al. (2018)	Hemicycliophoridae	Hemicycliophora	lutosa	1108	35.7	F	0.667057	0.0693739
Chitambar & Subbotin (2014)	Hemicycliophoridae	Hemicycliophora	lutosoides	982	22	F	1.22284	0.127175
Chitambar & Subbotin (2014)	Hemicycliophoridae	Hemicycliophora	lutosoides	941	25.3	F	0.813594	0.0846138
Chitambar & Subbotin (2014)	Hemicycliophoridae	Hemicycliophora	macrodorata	1520	28	F	2.79959	0.291158
Chitambar & Subbotin (2014)	Hemicycliophoridae	Hemicycliophora	minora	880	26	F	0.630059	0.0655262
Chitambar & Subbotin (2014)	Hemicycliophoridae	Hemicycliophora	minora	1140	25	F	1.48154	0.154081
Chitambar & Subbotin (2014)	Hemicycliophoridae	Hemicycliophora	minora	1090	26	F	1.19733	0.124522
Chitambar & Subbotin (2014)	Hemicycliophoridae	Hemicycliophora	minora	1180	24	F	1.7828	0.185412
Chitambar & Subbotin (2014)	Hemicycliophoridae	Hemicycliophora	minora	919	21.9	F	1.01144	0.105189
Chitambar & Subbotin (2014)	Hemicycliophoridae	Hemicycliophora	monticola	1110	26	F	1.26445	0.131503
Chitambar & Subbotin (2014)	Hemicycliophoridae	Hemicycliophora	nortoni	930	23	F	0.950327	0.098834
Chitambar & Subbotin (2014)	Hemicycliophoridae	Hemicycliophora	nortoni	804	24	F	0.563931	0.0586488
Chitambar & Subbotin (2014)	Hemicycliophoridae	Hemicycliophora	nortoni	920	24	F	0.844931	0.0878728
Chitambar & Subbotin (2014)	Hemicycliophoridae	Hemicycliophora	oostenbrinki	780	25.4	F	0.459723	0.0478112
Chitambar & Subbotin (2014)	Hemicycliophoridae	Hemicycliophora	oostenbrinki	820	25.5	F	0.529958	0.0551156
Chitambar & Subbotin (2014)	Hemicycliophoridae	Hemicycliophora	oostenbrinki	740	21	F	0.574297	0.0597269
Chitambar & Subbotin (2014)	Hemicycliophoridae	Hemicycliophora	oostenbrinki	830	22.2	F	0.725117	0.0754122
Chitambar & Subbotin (2014)	Hemicycliophoridae	Hemicycliophora	oostenbrinki	830	23.5	F	0.647111	0.0672995
Chitambar & Subbotin (2014)	Hemicycliophoridae	Hemicycliophora	oostenbrinki	840	24	F	0.643125	0.066885
Chitambar & Subbotin (2014)	Hemicycliophoridae	Hemicycliophora	oostenbrinki	790	23.5	F	0.557989	0.0580308
Chitambar & Subbotin (2014)	Hemicycliophoridae	Hemicycliophora	ornamenta	1140	25.7	F	1.40194	0.145801
Chitambar & Subbotin (2014)	Hemicycliophoridae	Hemicycliophora	parajuglandis	843	23.7	F	0.666601	0.0693265
Chitambar & Subbotin (2014)	Hemicycliophoridae	Hemicycliophora	parajuglandis	830	22	F	0.738361	0.0767896
Chitambar & Subbotin (2014)	Hemicycliophoridae	Hemicycliophora	parajuglandis	874	21.8	F	0.878014	0.0913134
Chitambar & Subbotin (2014)	Hemicycliophoridae	Hemicycliophora	popaensis	1266	20.6	F	2.98845	0.310799
Chitambar & Subbotin (2014)	Hemicycliophoridae	Hemicycliophora	poranga	1040	29	F	0.835957	0.0869395
Chitambar & Subbotin (2014)	Hemicycliophoridae	Hemicycliophora	poranga	950	30	F	0.595399	0.0619215
Chitambar & Subbotin (2014)	Hemicycliophoridae	Hemicycliophora	poranga	970	28.4	F	0.707227	0.0735516
Chitambar & Subbotin (2014)	Hemicycliophoridae	Hemicycliophora	poranga	960	27.1	F	0.752931	0.0783048
Chitambar & Subbotin (2014)	Hemicycliophoridae	Hemicycliophora	poranga	1020	31	F	0.690172	0.0717779
Chitambar & Subbotin (2014)	Hemicycliophoridae	Hemicycliophora	poranga	988	28.6	F	0.736917	0.0766394
Chitambar & Subbotin (2014)	Hemicycliophoridae	Hemicycliophora	poranga	961	27.2	F	0.749743	0.0779733
Chitambar & Subbotin (2014)	Hemicycliophoridae	Hemicycliophora	poranga	802	21.8	F	0.678407	0.0705543
Ghaderi et al. (2018)	Hemicycliophoridae	Hemicycliophora	poranga	919	23.6	F	0.870969	0.0905807
Chitambar & Subbotin (2014)	Hemicycliophoridae	Hemicycliophora	rara	1000	30.6	F	0.667478	0.0694177
Chitambar & Subbotin (2014)	Hemicycliophoridae	Hemicycliophora	ripa	936	22	F	1.05892	0.110127
Chitambar & Subbotin (2014)	Hemicycliophoridae	Hemicycliophora	ripa	880	25.1	F	0.676053	0.0703095
Chitambar & Subbotin (2014)	Hemicycliophoridae	Hemicycliophora	ripa	770	27	F	0.391403	0.040706
Chitambar & Subbotin (2014)	Hemicycliophoridae	Hemicycliophora	ripa	971	23.3	F	1.05396	0.109612
Ghaderi et al. (2018)	Hemicycliophoridae	Hemicycliophora	spinituberculata	900	30	F	0.50625	0.05265
Ghaderi et al. (2018)	Hemicycliophoridae	Hemicycliophora	sturhani	935	23.8	F	0.901905	0.0937982
Ghaderi et al. (2018)	Hemicycliophoridae	Hemicycliophora	sturhani	969	23.2	F	1.05651	0.109877
Brzeski (1998)	Hemicycliophoridae	Hemicycliophora	thienemanni	1020	29	F	0.78865	0.0820196
Brzeski (1998)	Hemicycliophoridae	Hemicycliophora	triangulum	780	26	F	0.43875	0.04563
Chitambar & Subbotin (2014)	Hemicycliophoridae	Hemicycliophora	triangulum	770	26	F	0.42209	0.0438974
Chitambar & Subbotin (2014)	Hemicycliophoridae	Hemicycliophora	triangulum	780	28	F	0.37831	0.0393442
Chitambar & Subbotin (2014)	Hemicycliophoridae	Hemicycliophora	triangulum	700	26	F	0.317123	0.0329808
Chitambar & Subbotin (2014)	Hemicycliophoridae	Hemicycliophora	triangulum	780	26	F	0.43875	0.04563
Chitambar & Subbotin (2014)	Hemicycliophoridae	Hemicycliophora	triangulum	690	26	F	0.303725	0.0315874
Chitambar & Subbotin (2014)	Hemicycliophoridae	Hemicycliophora	triangulum	700	29	F	0.254905	0.0265101
Brzeski (1998)	Hemicycliophoridae	Hemicycliophora	typica	780	22	F	0.6128	0.0637312
Chitambar & Subbotin (2014)	Hemicycliophoridae	Hemicycliophora	typica	840	18.5	F	1.08237	0.112566
Chitambar & Subbotin (2014)	Hemicycliophoridae	Hemicycliophora	typica	790	21	F	0.698751	0.0726701
Chitambar & Subbotin (2014)	Hemicycliophoridae	Hemicycliophora	typica	780	22	F	0.6128	0.0637312
Chitambar & Subbotin (2014)	Hemicycliophoridae	Hemicycliophora	typica	908	20.8	F	1.08146	0.112472
Chitambar & Subbotin (2014)	Hemicycliophoridae	Hemicycliophora	typica	780	23	F	0.560671	0.0583098
Chitambar & Subbotin (2014)	Hemicycliophoridae	Hemicycliophora	typica	750	19	F	0.730393	0.0759609
Chitambar & Subbotin (2014)	Hemicycliophoridae	Hemicycliophora	typica	708	20.4	F	0.53299	0.055431
Chitambar & Subbotin (2014)	Hemicycliophoridae	Hemicycliophora	typica	740	25.4	F	0.392562	0.0408264
Chitambar & Subbotin (2014)	Hemicycliophoridae	Hemicycliophora	typica	740	24	F	0.439696	0.0457284
Chitambar & Subbotin (2014)	Hemicycliophoridae	Hemicycliophora	typica	650	18	F	0.529755	0.0550945
Chitambar & Subbotin (2014)	Hemicycliophoridae	Hemicycliophora	typica	780	27.6	F	0.389355	0.0404929
Chitambar & Subbotin (2014)	Hemicycliophoridae	Hemicycliophora	typica	760	25	F	0.438976	0.0456535
Chitambar & Subbotin (2014)	Hemicycliophoridae	Hemicycliophora	typica	726	21.6	F	0.512604	0.0533109
Ghaderi et al. (2018)	Hemicycliophoridae	Hemicycliophora	vaccinii	1013	27.4	F	0.865381	0.0899996
Chitambar & Subbotin (2014)	Hemicycliophoridae	Hemicycliophora	wescae	1112	18.8	F	2.43152	0.252879
Chitambar & Subbotin (2014)	Hemicycliophoridae	Hemicycliophora	zuckermani	860	28	F	0.50706	0.0527342
Chitambar & Subbotin (2014)	Hemicycliophoridae	Hemicycliophora	arenaria	300	17.6	J2	0.0544777	0.00566568
Chitambar & Subbotin (2014)	Hemicycliophoridae	Hemicycliophora	eugeniae	620	34	J2	0.128854	0.0134008
Chitambar & Subbotin (2014)	Hemicycliophoridae	Hemicycliophora	poranga	369	23.3	J2	0.0578425	0.00601562
Chitambar & Subbotin (2014)	Hemicycliophoridae	Hemicycliophora	zuckermani	350	19	J2	0.0742296	0.00771988
Chitambar & Subbotin (2014)	Hemicycliophoridae	Hemicycliophora	arenaria	570	20.7	J3	0.270124	0.0280929
Chitambar & Subbotin (2014)	Hemicycliophoridae	Hemicycliophora	eugeniae	800	40	J3	0.2	0.0208
Chitambar & Subbotin (2014)	Hemicycliophoridae	Hemicycliophora	ornamenta	634	30.5	J3	0.171217	0.0178066
Chitambar & Subbotin (2014)	Hemicycliophoridae	Hemicycliophora	poranga	548	23.8	J3	0.18158	0.0188843
Chitambar & Subbotin (2014)	Hemicycliophoridae	Hemicycliophora	zuckermani	526	25	J3	0.145532	0.0151353
Chitambar & Subbotin (2014)	Hemicycliophoridae	Hemicycliophora	eugeniae	960	42	J4	0.313469	0.0326008
Chitambar & Subbotin (2014)	Hemicycliophoridae	Hemicycliophora	monticola	780	23	J4	0.560671	0.0583098
Chitambar & Subbotin (2014)	Hemicycliophoridae	Hemicycliophora	ornamenta	1025	24.5	J4	1.12129	0.116615
Chitambar & Subbotin (2014)	Hemicycliophoridae	Hemicycliophora	poranga	731	25	J4	0.390618	0.0406243
Chitambar & Subbotin (2014)	Hemicycliophoridae	Hemicycliophora	zuckermani	779	27	J4	0.405289	0.0421501
Chitambar & Subbotin (2014)	Hemicycliophoridae	Hemicycliophora	arenaria	670	23.5	J4 F	0.340384	0.0353999
Chitambar & Subbotin (2014)	Hemicycliophoridae	Hemicycliophora	popaensis	913	19.8	J4 F	1.21328	0.126181
Chitambar & Subbotin (2014)	Hemicycliophoridae	Hemicycliophora	arenaria	570	19.1	J4 M	0.317276	0.0329968
Chitambar & Subbotin (2014)	Hemicycliophoridae	Hemicycliophora	popaensis	862	22.9	J4 M	0.763363	0.0793897
Chitambar & Subbotin (2014)	Hemicycliophoridae	Caloosia	longicaudata	786	31.1	M	0.313781	0.0326332
Chitambar & Subbotin (2014)	Hemicycliophoridae	Caloosia	paxi	670	33	M	0.172614	0.0179519
Chitambar & Subbotin (2014)	Hemicycliophoridae	Caloosia	paxi	650	25	M	0.274625	0.028561
Chitambar & Subbotin (2014)	Hemicycliophoridae	Caloosia	triannulata	915	45	M	0.236439	0.0245896
Chitambar & Subbotin (2014)	Hemicycliophoridae	Hemicaloosia	americanae	640	40	M	0.1024	0.0106496
Chitambar & Subbotin (2014)	Hemicycliophoridae	Hemicaloosia	nudata	700	32	M	0.209351	0.0217725
Chitambar & Subbotin (2014)	Hemicycliophoridae	Hemicaloosia	paradoxa	610	34	M	0.122719	0.0127628
Chitambar & Subbotin (2014)	Hemicycliophoridae	Hemicaloosia	paradoxa	530	36	M	0.0717964	0.00746682
Chitambar & Subbotin (2014)	Hemicycliophoridae	Hemicaloosia	vagisclera	560	30.4	M	0.118767	0.0123518
Chitambar & Subbotin (2014)	Hemicycliophoridae	Hemicaloosia	vagisclera	610	35.7	M	0.11131	0.0115762
Chitambar & Subbotin (2014)	Hemicycliophoridae	Hemicycliophora	brzeskii	775	26.5	M	0.414279	0.0430851
Chitambar & Subbotin (2014)	Hemicycliophoridae	Hemicycliophora	brzeskii	690	24	M	0.356455	0.0370713
Chitambar & Subbotin (2014)	Hemicycliophoridae	Hemicycliophora	chathami	896	30.9	M	0.470855	0.0489689
Chitambar & Subbotin (2014)	Hemicycliophoridae	Hemicycliophora	dahomensis	960	41.7	M	0.317996	0.0330716
Chitambar & Subbotin (2014)	Hemicycliophoridae	Hemicycliophora	dhanachandi	590	34.4	M	0.108472	0.0112811
Chitambar & Subbotin (2014)	Hemicycliophoridae	Hemicycliophora	dulli	764	25	M	0.445944	0.0463781
Chitambar & Subbotin (2014)	Hemicycliophoridae	Hemicycliophora	epicharoides	790	35	M	0.251551	0.0261613
Chitambar & Subbotin (2014)	Hemicycliophoridae	Hemicycliophora	epicharoides	867	36.5	M	0.30574	0.0317969
Chitambar & Subbotin (2014)	Hemicycliophoridae	Hemicycliophora	fragilis	700	35.5	M	0.170105	0.0176909
Chitambar & Subbotin (2014)	Hemicycliophoridae	Hemicycliophora	helenica	1143	39	M	0.613606	0.063815
Chitambar & Subbotin (2014)	Hemicycliophoridae	Hemicycliophora	labiata	595	28	M	0.167925	0.0174642
Chitambar & Subbotin (2014)	Hemicycliophoridae	Hemicycliophora	labiata	801	33	M	0.294951	0.0306749
Chitambar & Subbotin (2014)	Hemicycliophoridae	Hemicycliophora	labiata	580	28.4	M	0.151191	0.0157239
Chitambar & Subbotin (2014)	Hemicycliophoridae	Hemicycliophora	labiata	560	24.5	M	0.182857	0.0190171
Chitambar & Subbotin (2014)	Hemicycliophoridae	Hemicycliophora	labiata	727	34.3	M	0.204124	0.0212289
Chitambar & Subbotin (2014)	Hemicycliophoridae	Hemicycliophora	macrodorata	1130	32.3	M	0.864391	0.0898967
Chitambar & Subbotin (2014)	Hemicycliophoridae	Hemicycliophora	nortoni	703	33	M	0.199397	0.0207373
Chitambar & Subbotin (2014)	Hemicycliophoridae	Hemicycliophora	oostenbrinki	660	30.6	M	0.191897	0.0199573
Chitambar & Subbotin (2014)	Hemicycliophoridae	Hemicycliophora	oostenbrinki	580	32.3	M	0.116885	0.012156
Chitambar & Subbotin (2014)	Hemicycliophoridae	Hemicycliophora	oostenbrinki	620	29.8	M	0.167735	0.0174444
Chitambar & Subbotin (2014)	Hemicycliophoridae	Hemicycliophora	parajuglandis	667	34.3	M	0.157641	0.0163947
Chitambar & Subbotin (2014)	Hemicycliophoridae	Hemicycliophora	parajuglandis	683	34.6	M	0.166337	0.0172991
Chitambar & Subbotin (2014)	Hemicycliophoridae	Hemicycliophora	parajuglandis	643	29.8	M	0.187103	0.0194587
Chitambar & Subbotin (2014)	Hemicycliophoridae	Hemicycliophora	popaensis	1127	36.8	M	0.660627	0.0687052
Chitambar & Subbotin (2014)	Hemicycliophoridae	Hemicycliophora	rara	860	39.7	M	0.252229	0.0262318
Ghaderi et al. (2018)	Hemicycliophoridae	Hemicycliophora	spinituberculata	680	32	M	0.191914	0.0199591
Chitambar & Subbotin (2014)	Hemicycliophoridae	Hemicycliophora	typica	680	30	M	0.218356	0.022709
Chitambar & Subbotin (2014)	Hemicycliophoridae	Hemicycliophora	typica	720	28	M	0.297551	0.0309453
Chitambar & Subbotin (2014)	Hemicycliophoridae	Hemicycliophora	typica	700	29	M	0.254905	0.0265101
Chitambar & Subbotin (2014)	Hemicycliophoridae	Hemicycliophora	typica	722	29	M	0.279702	0.029089
Chitambar & Subbotin (2014)	Hemicycliophoridae	Hemicycliophora	typica	560	30.4	M	0.118767	0.0123518
Chitambar & Subbotin (2014)	Hemicycliophoridae	Hemicycliophora	typica	551	27	M	0.143419	0.0149156
Chitambar & Subbotin (2014)	Hemicycliophoridae	Hemicycliophora	wescae	953	31.9	M	0.531591	0.0552854
Chitambar & Subbotin (2014)	Hemicycliophoridae	Hemicycliophora	zuckermani	830	39	M	0.234955	0.0244353
		Caloosia				F	0.605605
		Hemicaloosia				F	0.458719
		Hemicycliophora				F	0.878693
							0.647672
		Caloosia				M	0.249365
		Hemicaloosia				M	0.122724
		Hemicycliophora				M	0.285043
							0.219044
		Caloosia				J2
		Hemicaloosia				J2
		Hemicycliophora				J2	0.0788509
		Caloosia				J3
		Hemicaloosia				J3
		Hemicycliophora				J3	0.193691
		Caloosia				J4
		Hemicaloosia				J4
		Hemicycliophora				J4	0.60285

## Sheet: Telotylenchidae
Source	Family	Genus	Species	L	a	Life stage	Wfresh	Wdry
Original description	Telotylenchidae	Histotylenchus	historicus	1060	44	F	0.384496	0.0399876
Original description	Telotylenchidae	Histotylenchus	sudanensis	1170	43	F	0.541378	0.0563033
Original description	Telotylenchidae	Neodolichorhynchus	bicostatus	670	33.4	F	0.168504	0.0175245
Original description	Telotylenchidae	Neodolichorhynchus	elegans	560	23	F	0.207486	0.0215785
Original description	Telotylenchidae	Neodolichorhynchus	indicus	747	35.5	F	0.206721	0.021499
Ghaderi et al. (2018)	Telotylenchidae	Neodolichorhynchus	judithae	994	34	F	0.530984	0.0552223
Brzeski (1998)	Telotylenchidae	Neodolichorhynchus	microphasmis	870	28	F	0.524955	0.0545953
Original description	Telotylenchidae	Neodolichorhynchus	prophasmis	950	30	F	0.595399	0.0619215
Ghaderi et al. (2018)	Telotylenchidae	Neodolichorhynchus	sulcatus	676	31.4	F	0.195822	0.0203655
Original description	Telotylenchidae	Paratrophurus	acristylus	690	32.9	F	0.189686	0.0197274
Original description	Telotylenchidae	Paratrophurus	acrystylus	650	34	F	0.148478	0.0154417
Original description	Telotylenchidae	Paratrophurus	anomalus	678	37.8	F	0.136328	0.0141781
Original description	Telotylenchidae	Paratrophurus	costaricensis	541	29.9	F	0.110695	0.0115123
Ghaderi et al. (2018)	Telotylenchidae	Paratrophurus	kenanae	727	28.8	F	0.289533	0.0301114
Original description	Telotylenchidae	Paratrophurus	kenanae	785	31.3	F	0.308603	0.0320947
Original description	Telotylenchidae	Paratrophurus	loofi	674	33.7	F	0.1685	0.017524
Original description	Telotylenchidae	Paratrophurus	spenceri	653	30.8	F	0.18345	0.0190788
Ghaderi et al. (2018)	Telotylenchidae	Quinisulcius	capitatus	726	31.4	F	0.242566	0.0252269
Original description	Telotylenchidae	Quinisulcius	curvus	570	32	F	0.113033	0.0117554
Original description	Telotylenchidae	Quinisulcius	obregonus	520	30	F	0.0976444	0.010155
Original description	Telotylenchidae	Quinisulcius	quidi	567	25.8	F	0.171155	0.0178001
Original description	Telotylenchidae	Quinisulcius	seshadri	768	34.2	F	0.242054	0.0251736
Original description	Telotylenchidae	Quinisulcius	solani	660	32	F	0.175474	0.0182493
Original description	Telotylenchidae	Telotylenchus	indicus	580	28.6	F	0.149084	0.0155048
Original description	Telotylenchidae	Telotylenchus	lanceatus	700	32	F	0.209351	0.0217725
Original description	Telotylenchidae	Telotylenchus	obtusus	700	35	F	0.175	0.0182
Original description	Telotylenchidae	Trichotylenchus	astriatoides	620	34	F	0.128854	0.0134008
Original description	Telotylenchidae	Trichotylenchus	astriatus	570	27	F	0.158773	0.0165124
Ghaderi et al. (2018)	Telotylenchidae	Trichotylenchus	divittatus	591	34.6	F	0.107768	0.0112079
Original description	Telotylenchidae	Trichotylenchus	trilineatus	700	32.9	F	0.198053	0.0205976
Original description	Telotylenchidae	Trophurus	deboeri	850	49.3	F	0.157922	0.0164239
Ghaderi et al. (2018)	Telotylenchidae	Trophurus	lomus	784	31.3	F	0.307425	0.0319722
Ghaderi et al. (2018)	Telotylenchidae	Trophurus	minnesotensis	754	33	F	0.246018	0.0255858
Ghaderi et al. (2018)	Telotylenchidae	Trophurus	pakendorfi	770	33.3	F	0.257314	0.0267607
Original description	Telotylenchidae	Trophurus	similis	850	49	F	0.159862	0.0166256
Ghaderi et al. (2018)	Telotylenchidae	Trophurus	ussuriensis	710	31	F	0.232773	0.0242083
Ghaderi et al. (2018)	Telotylenchidae	Trophurus	ussuriensis	739	28.9	F	0.302007	0.0314088
Original description	Telotylenchidae	Trophurus	voltus	570	32	F	0.113033	0.0117554
Original description	Telotylenchidae	Tylenchorhynchus	aduncus	789	28.1	F	0.388775	0.0404326
Ghaderi et al. (2018)	Telotylenchidae	Tylenchorhynchus	agri	737	29.5	F	0.2875	0.0299
Ghaderi et al. (2018)	Telotylenchidae	Tylenchorhynchus	annulatus	669	35.4	F	0.149332	0.0155305
Ghaderi et al. (2018)	Telotylenchidae	Tylenchorhynchus	brassicae	618	30.2	F	0.161745	0.0168215
Ghaderi et al. (2018)	Telotylenchidae	Tylenchorhynchus	brevilineatus	618	29.5	F	0.169512	0.0176293
Ghaderi et al. (2018)	Telotylenchidae	Tylenchorhynchus	clarus	556	29.5	F	0.123441	0.0128379
Original description	Telotylenchidae	Tylenchorhynchus	crassicaudatus	640	31	F	0.170489	0.0177309
Original description	Telotylenchidae	Tylenchorhynchus	crotoni	550	29.2	F	0.121956	0.0126834
Brzeski (1998)	Telotylenchidae	Tylenchorhynchus	dubius	730	29	F	0.289103	0.0300667
Ghaderi et al. (2018)	Telotylenchidae	Tylenchorhynchus	dubius	753	33.3	F	0.240645	0.0250271
Ghaderi et al. (2018)	Telotylenchidae	Tylenchorhynchus	dubius	727	25.5	F	0.36932	0.0384093
Ghaderi et al. (2018)	Telotylenchidae	Tylenchorhynchus	dubius	750	33.3	F	0.23778	0.0247291
Ghaderi et al. (2018)	Telotylenchidae	Tylenchorhynchus	georgiensis	590	33.1	F	0.11716	0.0121847
Original description	Telotylenchidae	Tylenchorhynchus	graciliformis	780	45	F	0.146467	0.0152325
Original description	Telotylenchidae	Tylenchorhynchus	hispaniensis	662	30.4	F	0.196204	0.0204052
Original description	Telotylenchidae	Tylenchorhynchus	hispaniensis	658	33.2	F	0.161541	0.0168002
Original description	Telotylenchidae	Tylenchorhynchus	hispaniensis	711	32	F	0.219376	0.0228151
Original description	Telotylenchidae	Tylenchorhynchus	hispaniensis	714	32.5	F	0.215381	0.0223997
Original description	Telotylenchidae	Tylenchorhynchus	idahoensis	790	31	F	0.320655	0.0333481
Ghaderi et al. (2018)	Telotylenchidae	Tylenchorhynchus	iphilus	611	30.6	F	0.152251	0.0158341
Ghaderi et al. (2018)	Telotylenchidae	Tylenchorhynchus	iranensis	836	31.3	F	0.372744	0.0387653
Ghaderi et al. (2018)	Telotylenchidae	Tylenchorhynchus	latus	664	36.5	F	0.13734	0.0142834
Ghaderi et al. (2018)	Telotylenchidae	Tylenchorhynchus	leviterminalis	722	34.1	F	0.202294	0.0210386
Original description	Telotylenchidae	Tylenchorhynchus	leviterminalis	650	31	F	0.178606	0.0185751
Original description	Telotylenchidae	Tylenchorhynchus	mashhoodi	690	27.8	F	0.265667	0.0276294
Brzeski (1998)	Telotylenchidae	Tylenchorhynchus	maximus	1230	40	F	0.726901	0.0755977
Ghaderi et al. (2018)	Telotylenchidae	Tylenchorhynchus	maximus	1329	41.6	F	0.847751	0.0881661
Original description	Telotylenchidae	Tylenchorhynchus	maximus	1350	38.2	F	1.05379	0.109594
Original description	Telotylenchidae	Tylenchorhynchus	mediterraneus	1064	38.4	F	0.510555	0.0530977
Original description	Telotylenchidae	Tylenchorhynchus	mediterraneus	852	37.5	F	0.274876	0.0285871
Original description	Telotylenchidae	Tylenchorhynchus	mediterraneus	897	42.9	F	0.2451	0.0254904
Original description	Telotylenchidae	Tylenchorhynchus	microconus	500	27	F	0.107167	0.0111454
Ghaderi et al. (2018)	Telotylenchidae	Tylenchorhynchus	nudus	643	27	F	0.227922	0.0237038
Original description	Telotylenchidae	Tylenchorhynchus	ooti	800	37	F	0.233747	0.0243097
Ghaderi et al. (2018)	Telotylenchidae	Tylenchorhynchus	parvus	656	31.5	F	0.177816	0.0184928
Ghaderi et al. (2018)	Telotylenchidae	Tylenchorhynchus	parvus	754	31.3	F	0.273467	0.0284406
Original description	Telotylenchidae	Tylenchorhynchus	parvus	796	28	F	0.402071	0.0418154
Original description	Telotylenchidae	Tylenchorhynchus	parvus	810	28.2	F	0.417673	0.043438
Original description	Telotylenchidae	Tylenchorhynchus	parvus	685	27.5	F	0.265636	0.0276261
Ghaderi et al. (2018)	Telotylenchidae	Tylenchorhynchus	qasimii	692	35.1	F	0.168106	0.0174831
Original description	Telotylenchidae	Tylenchorhynchus	rudis	550	24	F	0.180528	0.018775
Original description	Telotylenchidae	Tylenchorhynchus	serranus	824	30	F	0.388525	0.0404066
Ghaderi et al. (2018)	Telotylenchidae	Tylenchorhynchus	teeni	732	28.9	F	0.293506	0.0305247
Original description	Telotylenchidae	Tylenchorhynchus	teeni	700	30.1	F	0.236614	0.0246079
Original description	Telotylenchidae	Tylenchorhynchus	tobari	690	36	F	0.158424	0.0164761
Original description	Telotylenchidae	Tylenchorhynchus	velatus	730	32	F	0.237437	0.0246935
Ghaderi et al. (2018)	Telotylenchidae	Tylenchorhynchus	ventrosignatus	676	33.7	F	0.170004	0.0176805
Original description	Telotylenchidae	Histotylenchus	historicus	1010	42	M	0.365044	0.0379646
Original description	Telotylenchidae	Histotylenchus	sudanensis	1110	44	M	0.441513	0.0459174
Original description	Telotylenchidae	Neodolichorhynchus	bicostatus	660	38	M	0.124436	0.0129413
Original description	Telotylenchidae	Neodolichorhynchus	elegans	530	27	M	0.127638	0.0132744
Original description	Telotylenchidae	Neodolichorhynchus	indicus	629	33.3	M	0.140263	0.0145874
Ghaderi et al. (2018)	Telotylenchidae	Neodolichorhynchus	judithae	872	33.7	M	0.364896	0.0379492
Original description	Telotylenchidae	Neodolichorhynchus	prophasmis	880	30	M	0.473244	0.0492174
Ghaderi et al. (2018)	Telotylenchidae	Neodolichorhynchus	sulcatus	637	32.1	M	0.156779	0.016305
Original description	Telotylenchidae	Paratrophurus	acristylus	696	34.1	M	0.181217	0.0188466
Original description	Telotylenchidae	Paratrophurus	acrystylus	680	39.5	M	0.125954	0.0130992
Original description	Telotylenchidae	Paratrophurus	anomalus	659	37.9	M	0.124525	0.0129506
Ghaderi et al. (2018)	Telotylenchidae	Paratrophurus	kenanae	714	33.7	M	0.200316	0.0208328
Original description	Telotylenchidae	Paratrophurus	kenanae	687	26.3	M	0.292981	0.03047
Original description	Telotylenchidae	Paratrophurus	loofi	598	34.2	M	0.11427	0.0118841
Original description	Telotylenchidae	Quinisulcius	obregonus	490	31	M	0.0765147	0.00795753
Original description	Telotylenchidae	Quinisulcius	quidi	521	25.4	M	0.137002	0.0142482
Original description	Telotylenchidae	Telotylenchus	indicus	598	32.6	M	0.125762	0.0130792
Original description	Telotylenchidae	Telotylenchus	lanceatus	515	38.7	M	0.0570006	0.00592807
Original description	Telotylenchidae	Telotylenchus	obtusus	700	40	M	0.133984	0.0139344
Original description	Telotylenchidae	Trichotylenchus	astriatoides	600	31	M	0.140479	0.0146098
Original description	Telotylenchidae	Trichotylenchus	astriatus	540	28.5	M	0.121163	0.012601
Ghaderi et al. (2018)	Telotylenchidae	Trichotylenchus	divittatus	582	35.6	M	0.0972185	0.0101107
Original description	Telotylenchidae	Trichotylenchus	trilineatus	580	27.6	M	0.160083	0.0166487
Original description	Telotylenchidae	Trophurus	deboeri	756	51.9	M	0.100256	0.0104266
Ghaderi et al. (2018)	Telotylenchidae	Trophurus	pakendorfi	700	37.5	M	0.152444	0.0158542
Original description	Telotylenchidae	Trophurus	similis	700	46	M	0.101311	0.0105364
Ghaderi et al. (2018)	Telotylenchidae	Trophurus	ussuriensis	620	31	M	0.155	0.01612
Original description	Telotylenchidae	Trophurus	voltus	510	35	M	0.0676791	0.00703862
Original description	Telotylenchidae	Tylenchorhynchus	aduncus	775	28.7	M	0.353201	0.0367329
Ghaderi et al. (2018)	Telotylenchidae	Tylenchorhynchus	agri	695	31.5	M	0.211453	0.0219911
Ghaderi et al. (2018)	Telotylenchidae	Tylenchorhynchus	brassicae	600	31.7	M	0.134343	0.0139717
Ghaderi et al. (2018)	Telotylenchidae	Tylenchorhynchus	brevilineatus	636	33.5	M	0.143272	0.0149003
Original description	Telotylenchidae	Tylenchorhynchus	crassicaudatus	660	29	M	0.213656	0.0222203
Ghaderi et al. (2018)	Telotylenchidae	Tylenchorhynchus	dubius	609	29.4	M	0.163319	0.0169852
Ghaderi et al. (2018)	Telotylenchidae	Tylenchorhynchus	dubius	737	27.7	M	0.326079	0.0339122
Ghaderi et al. (2018)	Telotylenchidae	Tylenchorhynchus	dubius	738	35	M	0.205075	0.0213278
Original description	Telotylenchidae	Tylenchorhynchus	graciliformis	720	50	M	0.093312	0.00970445
Original description	Telotylenchidae	Tylenchorhynchus	hispaniensis	640	31	M	0.170489	0.0177309
Original description	Telotylenchidae	Tylenchorhynchus	hispaniensis	682	33.2	M	0.179869	0.0187064
Original description	Telotylenchidae	Tylenchorhynchus	hispaniensis	693	34	M	0.179938	0.0187135
Original description	Telotylenchidae	Tylenchorhynchus	hispaniensis	691	30.2	M	0.2261	0.0235144
Ghaderi et al. (2018)	Telotylenchidae	Tylenchorhynchus	iranensis	767	31.9	M	0.277131	0.0288216
Ghaderi et al. (2018)	Telotylenchidae	Tylenchorhynchus	leviterminalis	692	33.2	M	0.187898	0.0195414
Original description	Telotylenchidae	Tylenchorhynchus	leviterminalis	620	36	M	0.114934	0.0119532
Original description	Telotylenchidae	Tylenchorhynchus	mashhoodi	650	31.3	M	0.175199	0.0182207
Original description	Telotylenchidae	Tylenchorhynchus	mediterraneus	1005	39.2	M	0.412863	0.0429378
Original description	Telotylenchidae	Tylenchorhynchus	mediterraneus	906	40.3	M	0.28619	0.0297638
Original description	Telotylenchidae	Tylenchorhynchus	mediterraneus	833	41	M	0.214905	0.0223502
Ghaderi et al. (2018)	Telotylenchidae	Tylenchorhynchus	nudus	640	22.2	M	0.332441	0.0345738
Ghaderi et al. (2018)	Telotylenchidae	Tylenchorhynchus	parvus	711	32	M	0.219376	0.0228151
Original description	Telotylenchidae	Tylenchorhynchus	parvus	796	33.6	M	0.279216	0.0290385
Original description	Telotylenchidae	Tylenchorhynchus	parvus	707	33.5	M	0.196811	0.0204683
Ghaderi et al. (2018)	Telotylenchidae	Tylenchorhynchus	qasimii	710	37.3	M	0.160782	0.0167213
Original description	Telotylenchidae	Tylenchorhynchus	rudis	520	29	M	0.104495	0.0108674
Original description	Telotylenchidae	Tylenchorhynchus	serranus	756	32	M	0.263721	0.027427
Ghaderi et al. (2018)	Telotylenchidae	Tylenchorhynchus	teeni	736	31.2	M	0.255979	0.0266218
Original description	Telotylenchidae	Tylenchorhynchus	teeni	660	30.6	M	0.191897	0.0199573
Original description	Telotylenchidae	Tylenchorhynchus	velatus	690	36	M	0.158424	0.0164761
Ghaderi et al. (2018)	Telotylenchidae	Tylenchorhynchus	ventrosignatus	703	36.3	M	0.164791	0.0171382
		Histotylenchus				F	0.462937
		Neodolichorhynchus				F	0.347124
		Paratrophurus				F	0.191909
		Quinisulcius				F	0.173654
		Telotylenchus				F	0.177812
		Trichotylenchus				F	0.148362
		Trophurus				F	0.222044
		Tylenchorhynchus				F	0.276445
							0.250036
		Histotylenchus				M	0.403279
		Neodolichorhynchus				M	0.231209
		Paratrophurus				M	0.17321
		Quinisulcius				M	0.106758
		Telotylenchus				M	0.105582
		Trichotylenchus				M	0.129736
		Trophurus				M	0.115338
		Tylenchorhynchus				M	0.212812
							0.184741

## Sheet: Dolichodoridae
Source	Family	Genus	Species	L	a	Life stage	Wfresh	Wdry
Original description	Dolichodoridae	Brachydorus	kazirangai	1740	69	F	0.69156	0.0719222
Original description	Dolichodoridae	Brachydorus	swarupi	2130	61	F	1.62315	0.168808
Original description	Dolichodoridae	Brachydorus	tenuis	1180	42	F	0.58214	0.0605426
Original description	Dolichodoridae	Carphodorus	bilineatus	1150	35	F	0.775957	0.0806995
Original description	Dolichodoridae	Dolichodorus	aquaticus	2900	68.7	F	3.22969	0.335888
Original description	Dolichodoridae	Dolichodorus	cobbi	2435	46.6	F	4.15533	0.432154
Original description	Dolichodoridae	Dolichodorus	heterocephalus	2366	43.6	F	4.35463	0.452882
Original description	Dolichodoridae	Dolichodorus	marylandicus	2120	45.5	F	2.8765	0.299156
Original description	Dolichodoridae	Dolichodorus	mediterraneus	1789	61.4	F	0.949236	0.0987206
Original description	Dolichodoridae	Dolichodorus	similis	2940	51.2	F	6.05874	0.630109
Original description	Dolichodoridae	Brachydorus	kazirangai	1380	61	J	0.441426	0.0459083
Original description	Dolichodoridae	Brachydorus	kazirangai	1600	65	M	0.605917	0.0630154
Original description	Dolichodoridae	Brachydorus	swarupi	1780	58	M	1.04781	0.108973
Original description	Dolichodoridae	Brachydorus	tenuis	990	41.2	M	0.357266	0.0371556
Original description	Dolichodoridae	Dolichodorus	aquaticus	2520	69.6	M	2.06473	0.214732
Original description	Dolichodoridae	Dolichodorus	cobbi	2057	52.6	M	1.96613	0.204477
Original description	Dolichodoridae	Dolichodorus	heterocephalus	1987	44	M	2.53261	0.263391
Original description	Dolichodoridae	Dolichodorus	marylandicus	1950	46.3	M	2.16183	0.22483
Original description	Dolichodoridae	Dolichodorus	mediterraneus	1552	63.8	M	0.574003	0.0596963
Original description	Dolichodoridae	Dolichodorus	similis	2350	46	M	3.83326	0.398659
		Brachydorus				F	0.965617
		Carphodorus				F	0.775957
		Dolichodorus				F	3.60402
							1.78186
		Brachydorus				M	0.670332
		Carphodorus				M
		Dolichodorus				M	2.18876
							1.42955
		Brachydorus				J	0.441426

## Sheet: Ataloderinae
Source	Family	Genus	Species	L	a	Life stage	Wfresh	Wdry
Original description	Ataloderinae	Atalodera	andinus	598	1.5	F	59.402	6.17781
Original description	Ataloderinae	Atalodera	carolynae	524	1.6	F	35.1264	3.65315
Original description	Ataloderinae	Atalodera	gracililancea	582	1.5	F	54.7604	5.69508
Original description	Ataloderinae	Belodera	utahensis	5046	1.7	F	27785.9	2889.73
Original description	Ataloderinae	Cryphodera	brinkmani	450	1.9	F	15.7765	1.64075
Original description	Ataloderinae	Cryphodera	kalesari	311	1.6	F	7.34381	0.763756
Original description	Ataloderinae	Cryphodera	sinensis	461	2	F	15.3082	1.59205
Original description	Ataloderinae	Atalodera	andinus	400	21	J2	0.0907029	0.00943311
Original description	Ataloderinae	Atalodera	carolynae	449	28.7	J2	0.0686839	0.00714313
Original description	Ataloderinae	Atalodera	gracililancea	474	27	J2	0.0913035	0.00949557
Original description	Ataloderinae	Atalodera	ucri	505	28.8	J2	0.0970441	0.0100926
Original description	Ataloderinae	Belodera	utahensis	534	25.8	J2	0.142976	0.0148695
Original description	Ataloderinae	Cryphodera	brinkmani	493	23.2	J2	0.139138	0.0144703
Original description	Ataloderinae	Cryphodera	kalesari	383	22	J2	0.0725489	0.00754509
Original description	Ataloderinae	Cryphodera	sinensis	435	22.6	J2	0.100724	0.0104752
Original description	Ataloderinae	Atalodera	andinus	1081	34	M	0.682966	0.0710285
Original description	Ataloderinae	Atalodera	carolynae	980	39.9	M	0.369498	0.0384278
Original description	Ataloderinae	Belodera	utahensis	9210	45.3	M	237.937	24.7455
Original description	Ataloderinae	Cryphodera	brinkmani	832	34.6	M	0.300675	0.0312702
Original description	Ataloderinae	Cryphodera	sinensis	670	31.6	M	0.188248	0.0195778
Original description	Meloidoderinae	Meloidodera	eurytyla	469	2.1	F	14.6204	1.52052
Original description	Meloidoderinae	Meloidodera	mexicana	669	1.6	F	73.1002	7.60242
Original description	Meloidoderinae	Meloidodera	zacanensis	461	1.61	F	23.6228	2.45677
Original description	Meloidoderinae	Meloidodera	eurytyla	580	24.9	J2	0.196682	0.020455
Original description	Meloidoderinae	Meloidodera	mexicana	330	19.6	J2	0.0584668	0.00608055
Original description	Meloidoderinae	Meloidodera	zacanensis	384	20.1	J2	0.0875955	0.00910993
Original description	Meloidoderinae	Meloidodera	eurytyla	732	33.5	M	0.218436	0.0227173
Original description	Meloidoderinae	Meloidodera	mexicana	580	23.5	M	0.220815	0.0229647
		Atalodera				F	49.7629
		Belodera				F	27785.9
		Cryphodera				F	12.8095
		Meloidodera				F	37.1145
							33.229
		Atalodera				M	0.526232
		Belodera				M	237.937
		Cryphodera				M	0.244462
		Meloidodera				M	0.219625
							0.330106
		Atalodera				J2	0.0869336
		Belodera				J2	0.142976
		Cryphodera				J2	0.104137
		Meloidodera				J2	0.114248
							0.112074

## Sheet: Aphelenchoididae
Source	Family	Genus	Species	L	a	Life stage	Wfresh	Wdry
Ghaderi et al. (2018)	Aphelenchoididae	Aphelenchoides	asterocaudatus	714	30.1	F	0.251097	0.0261141
Ghaderi et al. (2018)	Aphelenchoididae	Aphelenchoides	asterocaudatus	652	30.8	F	0.182609	0.0189913
Ghaderi et al. (2018)	Aphelenchoididae	Aphelenchoides	brassicae	665	29.1	F	0.21705	0.0225732
Ghaderi et al. (2018)	Aphelenchoididae	Aphelenchoides	centralis	740	34	F	0.219087	0.0227851
Ghaderi et al. (2018)	Aphelenchoididae	Aphelenchoides	centralis	768	34.4	F	0.239247	0.0248817
Ghaderi et al. (2018)	Aphelenchoididae	Aphelenchoides	composticola	618	32	F	0.144061	0.0149823
Ghaderi et al. (2018)	Aphelenchoididae	Aphelenchoides	composticola	717	28.5	F	0.283627	0.0294972
Ghaderi et al. (2018)	Aphelenchoididae	Aphelenchoides	curiolis	227	25.3	F	0.0114213	0.00118782
Ghaderi et al. (2018)	Aphelenchoididae	Aphelenchoides	cyrtus	606	30.3	F	0.1515	0.015756
Ghaderi et al. (2018)	Aphelenchoididae	Aphelenchoides	fuchsi	382	28.3	F	0.0435008	0.00452408
Ghaderi et al. (2018)	Aphelenchoididae	Aphelenchoides	graminis	627	31.5	F	0.155261	0.0161471
Ghaderi et al. (2018)	Aphelenchoididae	Aphelenchoides	haguei	427	31	F	0.0506338	0.00526591
Ghaderi et al. (2018)	Aphelenchoididae	Aphelenchoides	huntensis	580	26.4	F	0.174967	0.0181966
Ghaderi et al. (2018)	Aphelenchoididae	Aphelenchoides	iranicus	350	31	F	0.0278844	0.00289997
Ghaderi et al. (2018)	Aphelenchoididae	Aphelenchoides	lanceolatus	780	32.5	F	0.2808	0.0292032
Ghaderi et al. (2018)	Aphelenchoididae	Aphelenchoides	limberi	598	34	F	0.115618	0.0120243
Ghaderi et al. (2018)	Aphelenchoididae	Aphelenchoides	limberi	606	31.6	F	0.139291	0.0144863
Ghaderi et al. (2018)	Aphelenchoididae	Aphelenchoides	limberi	635	33.9	F	0.139252	0.0144822
Ghaderi et al. (2018)	Aphelenchoididae	Aphelenchoides	limberi	699	33.2	F	0.193658	0.0201404
Ghaderi et al. (2018)	Aphelenchoididae	Aphelenchoides	obtusicaudatus	541	26.9	F	0.136763	0.0142233
Ghaderi et al. (2018)	Aphelenchoididae	Aphelenchoides	parabicaudatus	365	27.4	F	0.0404816	0.00421008
Ghaderi et al. (2018)	Aphelenchoididae	Aphelenchoides	parabicaudatus	340	33.4	F	0.0220203	0.00229011
Ghaderi et al. (2018)	Aphelenchoididae	Aphelenchoides	parietinus	662	33	F	0.166505	0.0173165
Ghaderi et al. (2018)	Aphelenchoididae	Aphelenchoides	richardsoni	548	30	F	0.114282	0.0118854
Ghaderi et al. (2018)	Aphelenchoididae	Aphelenchoides	sacchari	545	33.8	F	0.0885597	0.00921021
Ghaderi et al. (2018)	Aphelenchoididae	Aphelenchoides	sacchari	507	25.8	F	0.122367	0.0127262
Ghaderi et al. (2018)	Aphelenchoididae	Aphelenchoides	sacchari	474	27.9	F	0.085508	0.00889283
Ghaderi et al. (2018)	Aphelenchoididae	Aphelenchoides	spicomucronatus	569	35.6	F	0.0908483	0.00944822
Ghaderi et al. (2018)	Aphelenchoididae	Aphelenchoides	spicomucronatus	352	25.5	F	0.0419206	0.00435974
Ghaderi et al. (2018)	Aphelenchoididae	Aphelenchoides	subtenuis	822	51.8	F	0.129371	0.0134546
Ghaderi et al. (2018)	Aphelenchoididae	Aprutides	guidettii	554	31	F	0.110582	0.0115006
Ghaderi et al. (2018)	Aphelenchoididae	Aprutides	guidettii	423	27.2	F	0.0639386	0.00664962
Ghaderi et al. (2018)	Aphelenchoididae	Aprutides	guidettii	478	26.7	F	0.0957505	0.00995806
Ghaderi et al. (2018)	Aphelenchoididae	Bursaphelenchus	mazandaranense	558	25	F	0.173741	0.0180691
Ghaderi et al. (2018)	Aphelenchoididae	Bursaphelenchus	willibaldi	506	26	F	0.11978	0.0124571
Ghaderi et al. (2018)	Aphelenchoididae	Devibursaphelenchus	kheirii	430	26.9	F	0.0686722	0.00714191
Ghaderi et al. (2018)	Aphelenchoididae	Ektaphelenchoides	andrassyi	543	37.8	F	0.0700319	0.00728332
Ghaderi et al. (2018)	Aphelenchoididae	Ektaphelenchoides	caspiensis	540	47.7	F	0.0432538	0.0044984
Ghaderi et al. (2018)	Aphelenchoididae	Ektaphelenchoides	compsi	740	27.5	F	0.334896	0.0348292
Ghaderi et al. (2018)	Aphelenchoididae	Ektaphelenchoides	fuchsi	617	33.1	F	0.133992	0.0139352
Ghaderi et al. (2018)	Aphelenchoididae	Ektaphelenchoides	hunti	824	40.7	F	0.211093	0.0219536
Ghaderi et al. (2018)	Aphelenchoididae	Ektaphelenchoides	kelardashtensis	524	38.9	F	0.0594258	0.00618028
Ghaderi et al. (2018)	Aphelenchoididae	Ektaphelenchoides	poinari	517	28.5	F	0.106331	0.0110585
Ghaderi et al. (2018)	Aphelenchoididae	Ektaphelenchoides	poinari	626	27.2	F	0.207236	0.0215525
Ghaderi et al. (2018)	Aphelenchoididae	Ektaphelenchoides	ruehmi	425	34.5	F	0.0403096	0.0041922
Ghaderi et al. (2018)	Aphelenchoididae	Ektaphelenchoides	sylvestris	722	28.8	F	0.2836	0.0294944
Ghaderi et al. (2018)	Aphelenchoididae	Ektaphelenchus	berbericus	609	32.3	F	0.135309	0.0140721
Ghaderi et al. (2018)	Aphelenchoididae	Laimaphelenchus	deconincki	620	37	F	0.108806	0.0113158
Ghaderi et al. (2018)	Aphelenchoididae	Laimaphelenchus	hyrcanus	763	33	F	0.254933	0.026513
Ghaderi et al. (2018)	Aphelenchoididae	Laimaphelenchus	penardi	758	33	F	0.249954	0.0259952
Ghaderi et al. (2018)	Aphelenchoididae	Laimaphelenchus	persicus	768	42.6	F	0.156007	0.0162247
Ghaderi et al. (2018)	Aphelenchoididae	Schistonchus	caprifici	445	31.7	F	0.0548077	0.0057
Ghaderi et al. (2018)	Aphelenchoididae	Seinura	demani	683	37.3	F	0.143128	0.0148853
Ghaderi et al. (2018)	Aphelenchoididae	Seinura	hyrcania	534	26	F	0.140785	0.0146417
Ghaderi et al. (2018)	Aphelenchoididae	Seinura	lii	758	28.4	F	0.337482	0.0350982
Ghaderi et al. (2018)	Aphelenchoididae	Seinura	linfordi	555	24.5	F	0.178003	0.0185123
Ghaderi et al. (2018)	Aphelenchoididae	Seinura	persica	519	28	F	0.111446	0.0115904
Ghaderi et al. (2018)	Aphelenchoididae	Seinura	prospera	458	33.2	F	0.0544754	0.00566544
Ghaderi et al. (2018)	Aphelenchoididae	Seinura	tenuicaudata	610	33	F	0.130269	0.013548
Ghaderi et al. (2018)	Aphelenchoididae	Sheraphelenchus	entomophagus	626	21.2	F	0.341139	0.0354784
Ghaderi et al. (2018)	Aphelenchoididae	Aphelenchoides	cyrtus	558	29	M	0.129118	0.0134283
Ghaderi et al. (2018)	Aphelenchoididae	Aphelenchoides	fuchsi	378	30.5	M	0.0362874	0.00377389
Ghaderi et al. (2018)	Aphelenchoididae	Aphelenchoides	graminis	534	32	M	0.0929402	0.00966579
Ghaderi et al. (2018)	Aphelenchoididae	Aphelenchoides	haguei	307	28	M	0.0230664	0.0023989
Ghaderi et al. (2018)	Aphelenchoididae	Aphelenchoides	iranicus	343	32.5	M	0.0238779	0.0024833
Ghaderi et al. (2018)	Aphelenchoididae	Aphelenchoides	subtenuis	841	56.3	M	0.117287	0.0121979
Ghaderi et al. (2018)	Aphelenchoididae	Bursaphelenchus	mazandaranense	496	26	M	0.112818	0.0117331
Ghaderi et al. (2018)	Aphelenchoididae	Bursaphelenchus	willibaldi	445	28	M	0.0702496	0.00730596
Ghaderi et al. (2018)	Aphelenchoididae	Devibursaphelenchus	kheirii	390	27.7	M	0.0483186	0.00502513
Ghaderi et al. (2018)	Aphelenchoididae	Ektaphelenchoides	andrassyi	500	38.3	M	0.0532589	0.00553893
Ghaderi et al. (2018)	Aphelenchoididae	Ektaphelenchoides	caspiensis	440	47.9	M	0.0232042	0.00241324
Ghaderi et al. (2018)	Aphelenchoididae	Ektaphelenchoides	compsi	700	34.5	M	0.180109	0.0187314
Ghaderi et al. (2018)	Aphelenchoididae	Ektaphelenchoides	fuchsi	453	28.8	M	0.070047	0.00728489
Ghaderi et al. (2018)	Aphelenchoididae	Ektaphelenchoides	hunti	702	46.2	M	0.1013	0.0105352
Ghaderi et al. (2018)	Aphelenchoididae	Ektaphelenchoides	kelardashtensis	400	33	M	0.0367309	0.00382002
Ghaderi et al. (2018)	Aphelenchoididae	Ektaphelenchoides	poinari	527	32.9	M	0.0845123	0.00878928
Ghaderi et al. (2018)	Aphelenchoididae	Ektaphelenchoides	poinari	644	33	M	0.153289	0.015942
Ghaderi et al. (2018)	Aphelenchoididae	Ektaphelenchoides	ruehmi	350	33	M	0.0246069	0.00255911
Ghaderi et al. (2018)	Aphelenchoididae	Laimaphelenchus	hyrcanus	834	43.1	M	0.195175	0.0202982
Ghaderi et al. (2018)	Aphelenchoididae	Laimaphelenchus	persicus	769	49.2	M	0.117416	0.0122113
Ghaderi et al. (2018)	Aphelenchoididae	Schistonchus	caprifici	351	23.4	M	0.0493594	0.00513337
Ghaderi et al. (2018)	Aphelenchoididae	Seinura	persica	515	28.5	M	0.105102	0.0109306
Ghaderi et al. (2018)	Aphelenchoididae	Sheraphelenchus	entomophagus	560	20.4	M	0.263745	0.0274295
		Aphelenchoides				F	0.135306
		Aprutides				F	0.0900905
		Bursaphelenchus				F	0.146761
		Devibursaphelenchus				F	0.0686722
		Ektaphelenchoides				F	0.149017
		Ektaphelenchus				F	0.135309
		Laimaphelenchus				F	0.192425
		Schistonchus				F	0.0548077
		Seinura				F	0.156513
		Sheraphelenchus				F	0.341139
							0.147004
		Aphelenchoides				M	0.0704295
		Aprutides				M
		Bursaphelenchus				M	0.0915338
		Devibursaphelenchus				M	0.0483186
		Ektaphelenchoides				M	0.0807842
		Ektaphelenchus				M
		Laimaphelenchus				M	0.156296
		Schistonchus				M	0.0493594
		Seinura				M	0.105102
		Sheraphelenchus				M	0.263745
							0.108196

## Sheet: Tylenchulidae
Source	Family	Genus	Species	L	a	Life stage	Wfresh	Wdry
Ghaderi et al. (2018)	Tylenchulidae	Cacopaurus	pestis	186	11.3	F	0.0314965	0.00327563
Original description	Tylenchulidae	Cacopaurus	pestis	230	6.5	F	0.179985	0.0187185
Original description	Tylenchulidae	Cacopaurus	pestis	240	7.7	F	0.145724	0.0151553
Original description	Tylenchulidae	Meloidoderita	kirjanovae	330	1.3	F	13.2903	1.38219
Original description	Tylenchulidae	Meloidoderita	polygoni	356	1.2	F	19.5825	2.03658
Original description	Tylenchulidae	Meloidoderita	safrica	286	1.3	F	8.6515	0.899756
Original description	Tylenchulidae	Meloidoderita	salina	260	1.3	F	6.5	0.676
Original description	Tylenchulidae	Paratylenchus	aculentus	280	23	F	0.0259357	0.00269732
Original description	Tylenchulidae	Paratylenchus	aculentus	250	21	F	0.0221443	0.002303
Original description	Tylenchulidae	Paratylenchus	aculentus	290	23	F	0.028815	0.00299676
Original description	Tylenchulidae	Paratylenchus	alleni	370	23	F	0.0598452	0.0062239
Original description	Tylenchulidae	Paratylenchus	alleni	390	25	F	0.059319	0.00616918
Original description	Tylenchulidae	Paratylenchus	alleni	370	26	F	0.0468315	0.00487048
Original description	Tylenchulidae	Paratylenchus	anceps	310	21.6	F	0.0399078	0.00415041
Ghaderi et al. (2018)	Tylenchulidae	Paratylenchus	arculatus	306	21	F	0.0406074	0.00422317
Ghaderi et al. (2018)	Tylenchulidae	Paratylenchus	arculatus	294	19.4	F	0.0422006	0.00438886
Ghaderi et al. (2018)	Tylenchulidae	Paratylenchus	arculatus	259	18.9	F	0.0303987	0.00316147
Ghaderi et al. (2018)	Tylenchulidae	Paratylenchus	arculatus	250	18.4	F	0.0288446	0.00299984
Ghaderi et al. (2018)	Tylenchulidae	Paratylenchus	audriellus	323	21.9	F	0.0439136	0.00456702
Original description	Tylenchulidae	Paratylenchus	baldacii	360	26	F	0.0431361	0.00448615
Original description	Tylenchulidae	Paratylenchus	breviculus	210	20	F	0.0144703	0.00150491
Brzeski (1998)	Tylenchulidae	Paratylenchus	bukowinensis	380	20	F	0.0857375	0.0089167
Ghaderi et al. (2018)	Tylenchulidae	Paratylenchus	bukowinensis	525	21.2	F	0.201227	0.0209276
Original description	Tylenchulidae	Paratylenchus	bukowinensis	380	18.9	F	0.096008	0.00998483
Original description	Tylenchulidae	Paratylenchus	bukowinensis	370	19.5	F	0.0832561	0.00865863
Original description	Tylenchulidae	Paratylenchus	bukowinensis	370	19.6	F	0.0824087	0.0085705
Original description	Tylenchulidae	Paratylenchus	bukowinensis	390	21.7	F	0.0787326	0.00818819
Original description	Tylenchulidae	Paratylenchus	bukowinensis	330	19.7	F	0.0578748	0.00601898
Original description	Tylenchulidae	Paratylenchus	ciccaronei	380	27	F	0.0470439	0.00489257
Original description	Tylenchulidae	Paratylenchus	colbrani	300	24	F	0.0292969	0.00304688
Ghaderi et al. (2018)	Tylenchulidae	Paratylenchus	colinus	286	23.1	F	0.0274002	0.00284962
Ghaderi et al. (2018)	Tylenchulidae	Paratylenchus	conicephalus	455	20	F	0.147182	0.0153069
Ghaderi et al. (2018)	Tylenchulidae	Paratylenchus	conicephalus	386	23.7	F	0.0639949	0.00665547
Ghaderi et al. (2018)	Tylenchulidae	Paratylenchus	coronatus	386	24.9	F	0.0579753	0.00602943
Ghaderi et al. (2018)	Tylenchulidae	Paratylenchus	coronatus	341	28	F	0.0316102	0.00328746
Ghaderi et al. (2018)	Tylenchulidae	Paratylenchus	coronatus	391	25.5	F	0.0574553	0.00597535
Original description	Tylenchulidae	Paratylenchus	costatus	310	25	F	0.029791	0.00309826
Brzeski (1998)	Tylenchulidae	Paratylenchus	elachistus	280	20	F	0.0343	0.0035672
Original description	Tylenchulidae	Paratylenchus	elegans	310	24	F	0.0323253	0.00336183
Original description	Tylenchulidae	Paratylenchus	enatus	310	26	F	0.0275435	0.00286452
Original description	Tylenchulidae	Paratylenchus	epacris	310	14.5	F	0.0885583	0.00921006
Original description	Tylenchulidae	Paratylenchus	goldeni	380	27	F	0.0470439	0.00489257
Original description	Tylenchulidae	Paratylenchus	goldeni	450	21	F	0.129145	0.0134311
Brzeski (1998)	Tylenchulidae	Paratylenchus	goodeyi	370	23	F	0.0598452	0.0062239
Original description	Tylenchulidae	Paratylenchus	hamatus	380	23	F	0.0648299	0.00674231
Original description	Tylenchulidae	Paratylenchus	holdemani	320	22	F	0.042314	0.00440066
Original description	Tylenchulidae	Paratylenchus	humilis	180	18	F	0.01125	0.00117
Original description	Tylenchulidae	Paratylenchus	idalimus	320	17.7	F	0.0653707	0.00679856
Original description	Tylenchulidae	Paratylenchus	intermedius	380	24.8	F	0.0557606	0.0057991
Ghaderi et al. (2018)	Tylenchulidae	Paratylenchus	labiosus	333	22.8	F	0.0443959	0.00461718
Original description	Tylenchulidae	Paratylenchus	latescens	270	19	F	0.0340772	0.00354403
Original description	Tylenchulidae	Paratylenchus	lepidus	330	25	F	0.035937	0.00373745
Original description	Tylenchulidae	Paratylenchus	lepidus	320	27	F	0.0280933	0.0029217
Ghaderi et al. (2018)	Tylenchulidae	Paratylenchus	leptos	204	14.8	F	0.0242241	0.0025193
Original description	Tylenchulidae	Paratylenchus	leptos	220	17	F	0.0230277	0.00239488
Original description	Tylenchulidae	Paratylenchus	lieodermis	380	22	F	0.0708574	0.00736917
Original description	Tylenchulidae	Paratylenchus	longicaudatus	280	21	F	0.0311111	0.00323556
Original description	Tylenchulidae	Paratylenchus	macrodorus	320	24	F	0.0355556	0.00369778
Original description	Tylenchulidae	Paratylenchus	mexicanus	350	20	F	0.0669922	0.00696719
Brzeski (1998)	Tylenchulidae	Paratylenchus	microdorus	360	21	F	0.0661224	0.00687673
Original description	Tylenchulidae	Paratylenchus	microdorus	350	20	F	0.0669922	0.00696719
Original description	Tylenchulidae	Paratylenchus	microdorus	340	20	F	0.0614125	0.0063869
Original description	Tylenchulidae	Paratylenchus	microdorus	340	19.6	F	0.0639447	0.00665025
Original description	Tylenchulidae	Paratylenchus	mimulus	220	18	F	0.0205401	0.00213617
Original description	Tylenchulidae	Paratylenchus	minusculus	240	25	F	0.013824	0.0014377
Original description	Tylenchulidae	Paratylenchus	minutus	260	20	F	0.0274625	0.0028561
Original description	Tylenchulidae	Paratylenchus	minutus	250	20	F	0.0244141	0.00253906
Original description	Tylenchulidae	Paratylenchus	minutus	270	20	F	0.0307547	0.00319849
Original description	Tylenchulidae	Paratylenchus	minutus	230	20	F	0.0190109	0.00197714
Original description	Tylenchulidae	Paratylenchus	mirus	330	21.4	F	0.0490449	0.00510067
Brzeski (1998)	Tylenchulidae	Paratylenchus	nanus	340	22	F	0.0507541	0.00527843
Ghaderi et al. (2018)	Tylenchulidae	Paratylenchus	nanus	401	23.4	F	0.0736006	0.00765446
Original description	Tylenchulidae	Paratylenchus	nanus	330	19	F	0.0622178	0.00647065
Original description	Tylenchulidae	Paratylenchus	nanus	370	24	F	0.054962	0.00571605
Original description	Tylenchulidae	Paratylenchus	nanus	310	23	F	0.0351973	0.00366052
Original description	Tylenchulidae	Paratylenchus	nawadus	350	23	F	0.0506557	0.00526819
Ghaderi et al. (2018)	Tylenchulidae	Paratylenchus	neoamblycephalus	384	23	F	0.0668988	0.00695747
Ghaderi et al. (2018)	Tylenchulidae	Paratylenchus	neoprojectus	387	22.3	F	0.0728456	0.00757594
Ghaderi et al. (2018)	Tylenchulidae	Paratylenchus	obtusicaudatus	275	21.9	F	0.0271013	0.00281853
Original description	Tylenchulidae	Paratylenchus	obtusicaudatus	260	23	F	0.0207656	0.00215962
Original description	Tylenchulidae	Paratylenchus	pandatus	380	26	F	0.0507322	0.00527615
Ghaderi et al. (2018)	Tylenchulidae	Paratylenchus	paraperaticus	298	24	F	0.0287148	0.00298634
Original description	Tylenchulidae	Paratylenchus	parvulus	350	28	F	0.0341797	0.00355469
Original description	Tylenchulidae	Paratylenchus	parvulus	260	22	F	0.0226963	0.00236041
Original description	Tylenchulidae	Paratylenchus	parvulus	350	24	F	0.0465224	0.00483832
Ghaderi et al. (2018)	Tylenchulidae	Paratylenchus	peraticus	310	24	F	0.0323253	0.00336183
Original description	Tylenchulidae	Paratylenchus	peraticus	310	24.5	F	0.0310194	0.00322601
Ghaderi et al. (2018)	Tylenchulidae	Paratylenchus	perlatus	221	22.9	F	0.0128643	0.00133789
Original description	Tylenchulidae	Paratylenchus	perlatus	190	21	F	0.0097208	0.00101096
Brzeski (1998)	Tylenchulidae	Paratylenchus	projectus	360	21	F	0.0661224	0.00687673
Original description	Tylenchulidae	Paratylenchus	projectus	370	19	F	0.0876956	0.00912035
Original description	Tylenchulidae	Paratylenchus	projectus	360	22	F	0.0602479	0.00626579
Original description	Tylenchulidae	Paratylenchus	projectus	390	21	F	0.0840689	0.00874316
Original description	Tylenchulidae	Paratylenchus	projectus	330	18	F	0.0693229	0.00720958
Original description	Tylenchulidae	Paratylenchus	projectus	400	23	F	0.0756144	0.00786389
Original description	Tylenchulidae	Paratylenchus	projectus	340	20	F	0.0614125	0.0063869
Original description	Tylenchulidae	Paratylenchus	salubris	230	19	F	0.0210648	0.00219073
Original description	Tylenchulidae	Paratylenchus	serricaudatus	240	21	F	0.0195918	0.00203755
Brzeski (1998)	Tylenchulidae	Paratylenchus	similis	350	23	F	0.0506557	0.00526819
Ghaderi et al. (2018)	Tylenchulidae	Paratylenchus	similis	324	20.3	F	0.0515849	0.00536483
Ghaderi et al. (2018)	Tylenchulidae	Paratylenchus	similis	325	22.6	F	0.0420062	0.00436864
Ghaderi et al. (2018)	Tylenchulidae	Paratylenchus	similis	359	25.7	F	0.0437822	0.00455334
Original description	Tylenchulidae	Paratylenchus	similis	380	27	F	0.0470439	0.00489257
Original description	Tylenchulidae	Paratylenchus	similis	360	24	F	0.050625	0.005265
Original description	Tylenchulidae	Paratylenchus	similis	280	22	F	0.0283471	0.0029481
Original description	Tylenchulidae	Paratylenchus	solivagus	240	24	F	0.015	0.00156
Brzeski (1998)	Tylenchulidae	Paratylenchus	steineri	300	23	F	0.0318998	0.00331758
Original description	Tylenchulidae	Paratylenchus	steineri	290	26	F	0.022549	0.0023451
Brzeski (1998)	Tylenchulidae	Paratylenchus	straeleni	350	22	F	0.0553654	0.00575801
Ghaderi et al. (2018)	Tylenchulidae	Paratylenchus	straeleni	340	24.7	F	0.0402646	0.00418751
Ghaderi et al. (2018)	Tylenchulidae	Paratylenchus	straeleni	325	22.5	F	0.0423804	0.00440756
Original description	Tylenchulidae	Paratylenchus	straeleni	390	24	F	0.0643652	0.00669398
Original description	Tylenchulidae	Paratylenchus	straeleni	370	23	F	0.0598452	0.0062239
Original description	Tylenchulidae	Paratylenchus	tenuicaudatus	420	26	F	0.0684985	0.00712385
Original description	Tylenchulidae	Paratylenchus	tenuicaudatus	440	28	F	0.0679082	0.00706245
Original description	Tylenchulidae	Paratylenchus	tenuicaudatus	380	24	F	0.0595399	0.00619215
Original description	Tylenchulidae	Paratylenchus	tenuicaudatus	500	26	F	0.11557	0.0120192
Original description	Tylenchulidae	Paratylenchus	teres	310	21	F	0.0422208	0.00439096
Ghaderi et al. (2018)	Tylenchulidae	Paratylenchus	variabilis	323	22.2	F	0.0427348	0.00444442
Original description	Tylenchulidae	Paratylenchus	variabilis	290	22	F	0.0314941	0.00327538
Brzeski (1998)	Tylenchulidae	Paratylenchus	veruculatus	270	19	F	0.0340772	0.00354403
Ghaderi et al. (2018)	Tylenchulidae	Paratylenchus	veruculatus	314	22.2	F	0.0392611	0.00408316
Original description	Tylenchulidae	Sphaeronema	alni	252	1.5	F	4.44528	0.462309
Original description	Tylenchulidae	Sphaeronema	alni	260	1.8	F	3.39043	0.352605
Original description	Tylenchulidae	Sphaeronema	alni	235	1.4	F	4.13835	0.430389
Original description	Tylenchulidae	Sphaeronema	camelliae	450	1.3	F	33.7001	3.50481
Original description	Tylenchulidae	Sphaeronema	rumicis	240	1.3	F	5.11243	0.531692
Ghaderi et al. (2018)	Tylenchulidae	Trophotylenchulus	arenarius	435	11.1	F	0.417544	0.0434245
Original description	Tylenchulidae	Trophotylenchulus	arenarius	493	15.1	F	0.328448	0.0341586
Original description	Tylenchulidae	Trophotylenchulus	asoense	461	13	F	0.362323	0.0376816
Original description	Tylenchulidae	Trophotylenchulus	colbrani	267	16.6	F	0.0431715	0.00448984
Original description	Tylenchulidae	Trophotylenchulus	okamotoi	513	9.9	F	0.860918	0.0895355
Ghaderi et al. (2018)	Tylenchulidae	Tylenchulus	musicola	287	4.8	F	0.641273	0.0666924
Ghaderi et al. (2018)	Tylenchulidae	Tylenchulus	semipenetrans	366	5.5	F	1.01297	0.105349
Ghaderi et al. (2018)	Tylenchulidae	Tylenchulus	semipenetrans	274	3.8	F	0.890358	0.0925972
Ghaderi et al. (2018)	Tylenchulidae	Tylenchulus	semipenetrans	277	5.6	F	0.423588	0.0440531
Brzeski (1998)	Tylenchulidae	Paratylenchus	macrodorus	330	23	immature F	0.0424586	0.0044157
Ghaderi et al. (2018)	Tylenchulidae	Tylenchulus	semipenetrans	274	16.7	Immature F	0.0460998	0.00479438
Original description	Tylenchulidae	Meloidoderita	kirjanovae	410	30.7	J2	0.0457041	0.00475322
Original description	Tylenchulidae	Meloidoderita	polygoni	447	27	J2	0.0765729	0.00796358
Original description	Tylenchulidae	Meloidoderita	safrica	389	28.1	J2	0.0465925	0.00484562
Original description	Tylenchulidae	Meloidoderita	safrica	397	27.8	J2	0.0506013	0.00526254
Original description	Tylenchulidae	Meloidoderita	safrica	375	26.4	J2	0.0472896	0.00491812
Original description	Tylenchulidae	Meloidoderita	salina	471	30.4	J2	0.0706636	0.00734901
Original description	Tylenchulidae	Paratylenchus	anceps	210	22.2	J2	0.0117444	0.00122142
Original description	Tylenchulidae	Paratylenchus	enatus	230	20	J2	0.0190109	0.00197714
Original description	Tylenchulidae	Paratylenchus	epacris	250	22.2	J2	0.019815	0.00206076
Original description	Tylenchulidae	Paratylenchus	idalimus	210	17.2	J2	0.0195651	0.00203477
Original description	Tylenchulidae	Paratylenchus	mirus	250	18.6	J2	0.0282276	0.00293567
Original description	Tylenchulidae	Paratylenchus	peraticus	220	22.6	J2	0.0130296	0.00135508
Brzeski (1998)	Tylenchulidae	Sphaeronema	alni	520	33	J2	0.0806979	0.00839258
Original description	Tylenchulidae	Sphaeronema	alni	530	31	J2	0.0968243	0.0100697
Original description	Tylenchulidae	Sphaeronema	alni	567	35	J2	0.0930022	0.00967223
Original description	Tylenchulidae	Sphaeronema	alni	488	30	J2	0.0807044	0.00839325
Original description	Tylenchulidae	Sphaeronema	camelliae	529	29.4	J2	0.107042	0.0111323
Original description	Tylenchulidae	Sphaeronema	rumicis	510	35	J2	0.0676791	0.00703862
Original description	Tylenchulidae	Trophotylenchulus	arenarius	420	21.6	J2	0.0992477	0.0103218
Original description	Tylenchulidae	Trophotylenchulus	asoense	295	21.4	J2	0.0350363	0.00364378
Original description	Tylenchulidae	Trophotylenchulus	colbrani	260	27	J2	0.0150686	0.00156713
Original description	Tylenchulidae	Trophotylenchulus	okamotoi	319	23.7	J2	0.0361206	0.00375655
Original description	Tylenchulidae	Tylenchulus	graminis	390	28.1	J2	0.0469528	0.00488309
Ghaderi et al. (2018)	Tylenchulidae	Tylenchulus	musicola	306	30.1	J2	0.0197657	0.00205563
Original description	Tylenchulidae	Tylenchulus	musicola	306	30.1	J2	0.0197657	0.00205563
Original description	Tylenchulidae	Tylenchulus	palustris	321	24.1	J2	0.0355927	0.00370164
Ghaderi et al. (2018)	Tylenchulidae	Tylenchulus	semipenetrans	332	31	J2	0.0237997	0.00247517
Ghaderi et al. (2018)	Tylenchulidae	Tylenchulus	semipenetrans	320	22	J2	0.042314	0.00440066
Ghaderi et al. (2018)	Tylenchulidae	Tylenchulus	semipenetrans	304	23.9	J2	0.0307401	0.00319697
Original description	Tylenchulidae	Tylenchulus	semipenetrans	363	27.4	J2	0.0398198	0.00414126
Original description	Tylenchulidae	Paratylenchus	anceps	270	21.4	J3	0.0268623	0.00279368
Original description	Tylenchulidae	Paratylenchus	epacris	290	18	J3	0.0470467	0.00489285
Original description	Tylenchulidae	Paratylenchus	mirus	310	21.3	J3	0.0410399	0.00426815
Original description	Tylenchulidae	Paratylenchus	peraticus	250	22	J3	0.0201769	0.0020984
Original description	Tylenchulidae	Paratylenchus	similis	320	24	J3	0.0355556	0.00369778
Original description	Tylenchulidae	Cacopaurus	pestis	230	13	J4	0.0449963	0.00467962
Original description	Tylenchulidae	Paratylenchus	costatus	280	18	J4	0.0423457	0.00440395
Original description	Tylenchulidae	Paratylenchus	enatus	310	24	J4	0.0323253	0.00336183
Original description	Tylenchulidae	Paratylenchus	epacris	290	15	J4	0.0677472	0.00704571
Original description	Tylenchulidae	Paratylenchus	idalimus	260	18.7	J4	0.0314135	0.00326701
Original description	Tylenchulidae	Paratylenchus	intermedius	420	26.8	J4	0.0644701	0.00670489
Original description	Tylenchulidae	Paratylenchus	latescens	260	15	J4	0.0488222	0.00507751
Original description	Tylenchulidae	Paratylenchus	peraticus	280	25.4	J4	0.021266	0.00221167
Original description	Tylenchulidae	Paratylenchus	teres	340	21	J4	0.0557029	0.00579311
Ghaderi et al. (2018)	Tylenchulidae	Cacopaurus	pestis	246	30.5	M	0.010002	0.00104021
Original description	Tylenchulidae	Cacopaurus	pestis	270	30	M	0.0136688	0.00142155
Original description	Tylenchulidae	Cacopaurus	pestis	270	34	M	0.0106418	0.00110674
Original description	Tylenchulidae	Meloidoderita	polygoni	446	31.4	M	0.0562374	0.00584869
Original description	Tylenchulidae	Meloidoderita	safrica	393	41.4	M	0.0221339	0.00230192
Original description	Tylenchulidae	Meloidoderita	salina	469	40	M	0.0402975	0.00419094
Original description	Tylenchulidae	Paratylenchus	aculentus	330	28	M	0.0286488	0.00297947
Original description	Tylenchulidae	Paratylenchus	aculentus	270	26	M	0.018198	0.0018926
Original description	Tylenchulidae	Paratylenchus	aculentus	310	27	M	0.025541	0.00265626
Ghaderi et al. (2018)	Tylenchulidae	Paratylenchus	arculatus	262	23.3	M	0.0207048	0.0021533
Ghaderi et al. (2018)	Tylenchulidae	Paratylenchus	arculatus	300	26.7	M	0.0236713	0.00246181
Ghaderi et al. (2018)	Tylenchulidae	Paratylenchus	arculatus	300	26.7	M	0.0236713	0.00246181
Ghaderi et al. (2018)	Tylenchulidae	Paratylenchus	audriellus	239	17.5	M	0.0278611	0.00289755
Original description	Tylenchulidae	Paratylenchus	baldacii	370	35	M	0.0258434	0.00268771
Original description	Tylenchulidae	Paratylenchus	ciccaronei	370	34	M	0.0273859	0.00284814
Original description	Tylenchulidae	Paratylenchus	colbrani	290	30	M	0.0169368	0.00176143
Ghaderi et al. (2018)	Tylenchulidae	Paratylenchus	colinus	320	26	M	0.0302959	0.00315077
Ghaderi et al. (2018)	Tylenchulidae	Paratylenchus	coronatus	373	33.6	M	0.0287295	0.00298787
Ghaderi et al. (2018)	Tylenchulidae	Paratylenchus	coronatus	303	31	M	0.0180919	0.00188156
Ghaderi et al. (2018)	Tylenchulidae	Paratylenchus	coronatus	380	29	M	0.0407788	0.004241
Original description	Tylenchulidae	Paratylenchus	costatus	340	28	M	0.0313329	0.00325862
Original description	Tylenchulidae	Paratylenchus	enatus	345	33.5	M	0.022869	0.00237838
Original description	Tylenchulidae	Paratylenchus	goldeni	330	29	M	0.026707	0.00277753
Original description	Tylenchulidae	Paratylenchus	hamatus	410	35	M	0.0351638	0.00365703
Original description	Tylenchulidae	Paratylenchus	holdemani	290	27	M	0.0209096	0.0021746
Original description	Tylenchulidae	Paratylenchus	humilis	200	24	M	0.00868056	0.000902778
Original description	Tylenchulidae	Paratylenchus	idalimus	350	24	M	0.0465224	0.00483832
Ghaderi et al. (2018)	Tylenchulidae	Paratylenchus	labiosus	362	29.2	M	0.0347728	0.00361637
Original description	Tylenchulidae	Paratylenchus	latescens	290	26	M	0.022549	0.0023451
Ghaderi et al. (2018)	Tylenchulidae	Paratylenchus	leptos	206	14.8	M	0.0249435	0.00259413
Original description	Tylenchulidae	Paratylenchus	longicaudatus	240	28	M	0.0110204	0.00114612
Original description	Tylenchulidae	Paratylenchus	mimulus	210	23	M	0.0109416	0.00113793
Original description	Tylenchulidae	Paratylenchus	minusculus	260	28	M	0.0140115	0.00145719
Original description	Tylenchulidae	Paratylenchus	minutus	250	25	M	0.015625	0.001625
Original description	Tylenchulidae	Paratylenchus	nanus	380	28	M	0.0437436	0.00454934
Ghaderi et al. (2018)	Tylenchulidae	Paratylenchus	obtusicaudatus	240	25	M	0.013824	0.0014377
Ghaderi et al. (2018)	Tylenchulidae	Paratylenchus	paraperaticus	324	34	M	0.018389	0.00191245
Original description	Tylenchulidae	Paratylenchus	parvulus	310	29	M	0.0221396	0.00230251
Original description	Tylenchulidae	Paratylenchus	peraticus	320	33.4	M	0.0183585	0.00190928
Original description	Tylenchulidae	Paratylenchus	perlatus	190	25	M	0.006859	0.000713336
Original description	Tylenchulidae	Paratylenchus	salubris	240	24	M	0.015	0.00156
Original description	Tylenchulidae	Paratylenchus	serricaudatus	240	32	M	0.0084375	0.0008775
Original description	Tylenchulidae	Paratylenchus	steineri	350	33	M	0.0246069	0.00255911
Original description	Tylenchulidae	Paratylenchus	straeleni	360	30	M	0.0324	0.0033696
Original description	Tylenchulidae	Paratylenchus	straeleni	370	31	M	0.0329429	0.00342606
Original description	Tylenchulidae	Paratylenchus	tenuicaudatus	380	30	M	0.0381056	0.00396298
Original description	Tylenchulidae	Paratylenchus	tenuicaudatus	410	26	M	0.0637213	0.00662702
Original description	Tylenchulidae	Paratylenchus	tenuicaudatus	400	30	M	0.0444444	0.00462222
Original description	Tylenchulidae	Paratylenchus	teres	350	30	M	0.0297743	0.00309653
Original description	Tylenchulidae	Paratylenchus	variabilis	310	31	M	0.019375	0.002015
Original description	Tylenchulidae	Sphaeronema	camelliae	528	41.7	M	0.0529066	0.00550228
Original description	Tylenchulidae	Sphaeronema	rumicis	473	46	M	0.031257	0.00325073
Ghaderi et al. (2018)	Tylenchulidae	Trophotylenchulus	arenarius	490	34	M	0.0636078	0.00661521
Original description	Tylenchulidae	Trophotylenchulus	asoense	442	30.9	M	0.0565236	0.00587846
Original description	Tylenchulidae	Trophotylenchulus	colbrani	330	31	M	0.0233721	0.0024307
Original description	Tylenchulidae	Trophotylenchulus	okamotoi	483	30.5	M	0.0757045	0.00787327
Original description	Tylenchulidae	Tylenchulus	graminis	479	32.2	M	0.0662483	0.00688982
Ghaderi et al. (2018)	Tylenchulidae	Tylenchulus	musicola	310	27.2	M	0.0251668	0.00261734
Original description	Tylenchulidae	Tylenchulus	musicola	310	27.2	M	0.0251668	0.00261734
Original description	Tylenchulidae	Tylenchulus	palustris	371	27.7	M	0.0415951	0.00432589
Ghaderi et al. (2018)	Tylenchulidae	Tylenchulus	semipenetrans	360	43.3	M	0.0155529	0.0016175
Ghaderi et al. (2018)	Tylenchulidae	Tylenchulus	semipenetrans	350	30	M	0.0297743	0.00309653
Ghaderi et al. (2018)	Tylenchulidae	Tylenchulus	semipenetrans	325	30.6	M	0.0229133	0.00238298
Original description	Tylenchulidae	Tylenchulus	semipenetrans	362	32.1	M	0.0287737	0.00299246
Original description	Tylenchulidae	Paratylenchus	latescens	370	5.5	mature F	1.04655	0.108841
Original description	Tylenchulidae	Tylenchulus	graminis	306	4.7	mature F	0.810678	0.0843105
Original description	Tylenchulidae	Tylenchulus	graminis	250	4.1	mature F	0.580941	0.0604179
Original description	Tylenchulidae	Tylenchulus	musicola	287	4.8	mature F	0.641273	0.0666924
Original description	Tylenchulidae	Tylenchulus	palustris	321	4.1	mature F	1.22978	0.127897
Original description	Tylenchulidae	Tylenchulus	semipenetrans	389	4.5	mature F	1.81679	0.188946
		Cacopaurus				F	0.119069
		Meloidoderita				F	12.0061
		Paratylenchus				F	0.0493511
		Sphaeronema				F	10.1573
		Trophotylenchulus				F	0.402481
		Tylenchulus				F (mature)	1.01589
		all					3.95836
		vermiform					0.0493511
		obese					0.119069
		swollen					5.89544
		Cacopaurus				M	0.0114375
		Meloidoderita				M	0.0395563
		Paratylenchus				M	0.0253302
		Sphaeronema				M	0.0420818
		Trophotylenchulus				M	0.054802
		Tylenchulus				M	0.0318989
		all					0.0341844
		vermiform					0.0253302
		obese					0.0395563
		swollen					0.0420847
		Cacopaurus				J2
		Meloidoderita				J2	0.0562373
		Paratylenchus				J2	0.0185654
		Sphaeronema				J2	0.0876582
		Trophotylenchulus				J2	0.0463683
		Tylenchulus				J2	0.0323438
							0.0482346
		Cacopaurus				J3
		Meloidoderita				J3
		Paratylenchus				J3	0.0341363
		Sphaeronema				J3
		Trophotylenchulus				J3
		Tylenchulus				J3
		Cacopaurus				J4	0.0449963
		Meloidoderita				J4
		Paratylenchus				J4	0.0455116
		Sphaeronema				J4
		Trophotylenchulus				J4
		Tylenchulus				J4

## Sheet: Tylenchidae
Source	Family	Genus	Species	L	a	Life stage	Wfresh	Wdry
Brzeski (1998)	Tylenchidae	Aglenchus	agricola	550	30.6	F	0.111052	0.0115494
Ghaderi et al. (2018)	Tylenchidae	Aglenchus	agricola	579	34.2	F	0.10372	0.0107869
Ghaderi et al. (2018)	Tylenchidae	Aglenchus	microstylus	603	34.9	F	0.112507	0.0117008
Ghaderi et al. (2018)	Tylenchidae	Atetylenchus	abulbosus	1377	39.2	F	1.06196	0.110444
Ghaderi et al. (2018)	Tylenchidae	Atetylenchus	graminis	700	35	F	0.175	0.0182
Ghaderi et al. (2018)	Tylenchidae	Atetylenchus	minor	633	37	F	0.115794	0.0120426
Ghaderi et al. (2018)	Tylenchidae	Basiria	birjandiensis	661	38.2	F	0.123697	0.0128644
Ghaderi et al. (2018)	Tylenchidae	Basiria	duplexa	751	38	F	0.18333	0.0190663
Brzeski (1998)	Tylenchidae	Basiria	gracilis	770	35	F	0.232925	0.0242242
Ghaderi et al. (2018)	Tylenchidae	Basiria	graminophila	707	37	F	0.161337	0.0167791
Ghaderi et al. (2018)	Tylenchidae	Basiria	graminophila	761	39.5	F	0.176539	0.01836
Ghaderi et al. (2018)	Tylenchidae	Boleodorus	thylactus	503	30.2	F	0.0872108	0.00906992
Ghaderi et al. (2018)	Tylenchidae	Boleodorus	thylactus	604	37	F	0.100598	0.0104621
Ghaderi et al. (2018)	Tylenchidae	Boleodorus	thylactus	598	35.4	F	0.106654	0.011092
Ghaderi et al. (2018)	Tylenchidae	Boleodorus	thylactus	483	27	F	0.0966037	0.0100468
Ghaderi et al. (2018)	Tylenchidae	Boleodorus	thylactus	544	29.5	F	0.11562	0.0120245
Ghaderi et al. (2018)	Tylenchidae	Boleodorus	volutus	484	27.4	F	0.0943876	0.00981631
Brzeski (1998)	Tylenchidae	Cephalenchus	hexalineatus	520	28.5	F	0.108193	0.0112521
Ghaderi et al. (2018)	Tylenchidae	Cephalenchus	leptus	634	42.5	F	0.08818	0.00917072
Ghaderi et al. (2018)	Tylenchidae	Cephalenchus	lobus	638	48.2	F	0.0698631	0.00726576
Brzeski (1998)	Tylenchidae	Coslenchus	alacinatus	520	26	F	0.13	0.01352
Brzeski (1998)	Tylenchidae	Coslenchus	andrassyi	520	26	F	0.13	0.01352
Brzeski (1998)	Tylenchidae	Coslenchus	areolatus	490	28	F	0.0937891	0.00975406
Ghaderi et al. (2018)	Tylenchidae	Coslenchus	areolatus	505	32.9	F	0.0743639	0.00773385
Ghaderi et al. (2018)	Tylenchidae	Coslenchus	assamensis	514	29.7	F	0.096218	0.0100067
Brzeski (1998)	Tylenchidae	Coslenchus	costatus	510	28	F	0.105749	0.0109979
Ghaderi et al. (2018)	Tylenchidae	Coslenchus	costatus	495	27	F	0.103984	0.0108144
Ghaderi et al. (2018)	Tylenchidae	Coslenchus	costatus	488	25.6	F	0.110831	0.0115264
Ghaderi et al. (2018)	Tylenchidae	Coslenchus	franklinae	519	28.7	F	0.106076	0.0110319
Ghaderi et al. (2018)	Tylenchidae	Coslenchus	japonicus	525	34	F	0.0782348	0.00813642
Brzeski (1998)	Tylenchidae	Coslenchus	leiocephalus	460	27	F	0.0834499	0.00867879
Brzeski (1998)	Tylenchidae	Coslenchus	leiocephalus	470	26	F	0.0959902	0.00998298
Brzeski (1998)	Tylenchidae	Coslenchus	leiocephalus	460	27	F	0.0834499	0.00867879
Ghaderi et al. (2018)	Tylenchidae	Coslenchus	liocephalus	424	24.6	F	0.078724	0.0081873
Brzeski (1998)	Tylenchidae	Coslenchus	multigyrus	520	31	F	0.0914464	0.00951043
Ghaderi et al. (2018)	Tylenchidae	Coslenchus	multigyrus	530	29.6	F	0.1062	0.0110448
Brzeski (1998)	Tylenchidae	Coslenchus	oligogyrus	520	24	F	0.152569	0.0158672
Ghaderi et al. (2018)	Tylenchidae	Coslenchus	oligogyrus	504	28.6	F	0.0978227	0.0101736
Brzeski (1998)	Tylenchidae	Coslenchus	polonicus	760	42	F	0.155533	0.0161754
Ghaderi et al. (2018)	Tylenchidae	Coslenchus	polonicus	615	33	F	0.133499	0.0138839
Ghaderi et al. (2018)	Tylenchidae	Coslenchus	polygyrus	585	33.6	F	0.110833	0.0115266
Ghaderi et al. (2018)	Tylenchidae	Coslenchus	polygyrus	545	33.5	F	0.0901529	0.00937591
Ghaderi et al. (2018)	Tylenchidae	Coslenchus	pycnocephalus	490	31.6	F	0.0736367	0.00765821
Ghaderi et al. (2018)	Tylenchidae	Coslenchus	rhombus	565	30	F	0.125251	0.0130262
Ghaderi et al. (2018)	Tylenchidae	Discopersicus	iranicus	707	36.8	F	0.163096	0.016962
Ghaderi et al. (2018)	Tylenchidae	Discopersicus	iranicus	734	42.4	F	0.137479	0.0142978
Ghaderi et al. (2018)	Tylenchidae	Discotylenchus	attenuatus	423	34	F	0.0409207	0.00425576
Ghaderi et al. (2018)	Tylenchidae	Discotylenchus	biannulatus	691	40.3	F	0.126971	0.013205
Ghaderi et al. (2018)	Tylenchidae	Discotylenchus	brevicaudatus	442	35	F	0.0440566	0.00458188
Ghaderi et al. (2018)	Tylenchidae	Discotylenchus	discretus	581	35.1	F	0.0994934	0.0103473
Ghaderi et al. (2018)	Tylenchidae	Discotylenchus	lorestanensis	508	33.3	F	0.0738895	0.00768451
Ghaderi et al. (2018)	Tylenchidae	Ecphyadophora	quadralata	880	120	F	0.0295778	0.00307609
Ghaderi et al. (2018)	Tylenchidae	Eutylenchus	excretorius	945	43.2	F	0.282623	0.0293928
Ghaderi et al. (2018)	Tylenchidae	Filenchus	acris	409	35	F	0.0349071	0.00363034
Ghaderi et al. (2018)	Tylenchidae	Filenchus	acris	400	36.5	F	0.0300244	0.00312254
Ghaderi et al. (2018)	Tylenchidae	Filenchus	afghanicus	625	41.1	F	0.0903309	0.00939442
Brzeski (1998)	Tylenchidae	Filenchus	andrassyi	790	32	F	0.300927	0.0312964
Ghaderi et al. (2018)	Tylenchidae	Filenchus	annulatus	402	33	F	0.0372847	0.00387761
Ghaderi et al. (2018)	Tylenchidae	Filenchus	aquilonius	835	33.2	F	0.330113	0.0343318
Brzeski (1998)	Tylenchidae	Filenchus	baloghi	470	35	F	0.0529709	0.00550898
Ghaderi et al. (2018)	Tylenchidae	Filenchus	baloghi	511	38	F	0.0577531	0.00600633
Ghaderi et al. (2018)	Tylenchidae	Filenchus	butteus	714	35.6	F	0.179504	0.0186684
Ghaderi et al. (2018)	Tylenchidae	Filenchus	cylindricaudus	670	39	F	0.123588	0.0128531
Ghaderi et al. (2018)	Tylenchidae	Filenchus	cylindricaudus	716	33.5	F	0.204423	0.02126
Brzeski (1998)	Tylenchidae	Filenchus	discrepans	430	36	F	0.0383425	0.00398762
Ghaderi et al. (2018)	Tylenchidae	Filenchus	discrepans	530	45.6	F	0.0447484	0.00465384
Ghaderi et al. (2018)	Tylenchidae	Filenchus	discrepans	530	42.2	F	0.0522496	0.00543396
Ghaderi et al. (2018)	Tylenchidae	Filenchus	ditissimus	425	33	F	0.0440574	0.00458197
Ghaderi et al. (2018)	Tylenchidae	Filenchus	ditissimus	408	34	F	0.03672	0.00381888
Ghaderi et al. (2018)	Tylenchidae	Filenchus	elegantulus	733	37.3	F	0.176919	0.0183996
Brzeski (1998)	Tylenchidae	Filenchus	facultativus	490	32	F	0.0718073	0.00746795
Ghaderi et al. (2018)	Tylenchidae	Filenchus	facultativus	460	35	F	0.0496612	0.00516477
Ghaderi et al. (2018)	Tylenchidae	Filenchus	facultativus	462	36.5	F	0.0462616	0.0048112
Ghaderi et al. (2018)	Tylenchidae	Filenchus	facultativus	431	37.3	F	0.0359662	0.00374048
Ghaderi et al. (2018)	Tylenchidae	Filenchus	fortis	545	33.5	F	0.0901529	0.00937591
Brzeski (1998)	Tylenchidae	Filenchus	hamatus	480	28	F	0.0881633	0.00916898
Ghaderi et al. (2018)	Tylenchidae	Filenchus	hamatus	747	37	F	0.1903	0.0197912
Brzeski (1998)	Tylenchidae	Filenchus	hamuliger	630	43.6	F	0.0822108	0.00854992
Brzeski (1998)	Tylenchidae	Filenchus	hamuliger	698	40.2	F	0.131521	0.0136782
Ghaderi et al. (2018)	Tylenchidae	Filenchus	hamuliger	534	39.2	F	0.0619344	0.00644117
Ghaderi et al. (2018)	Tylenchidae	Filenchus	longicaudatulus	399	39.7	F	0.0251894	0.0026197
Brzeski (1998)	Tylenchidae	Filenchus	misellus	320	29	F	0.024352	0.0025326
Ghaderi et al. (2018)	Tylenchidae	Filenchus	misellus	365	28.8	F	0.0366415	0.00381072
Ghaderi et al. (2018)	Tylenchidae	Filenchus	misellus	431	36	F	0.0386106	0.0040155
Brzeski (1998)	Tylenchidae	Filenchus	nemorosus	610	30	F	0.157626	0.0163931
Brzeski (1998)	Tylenchidae	Filenchus	orbus	670	31	F	0.195605	0.020343
Ghaderi et al. (2018)	Tylenchidae	Filenchus	paravesiculosus	468	36	F	0.0494325	0.00514098
Ghaderi et al. (2018)	Tylenchidae	Filenchus	polyhypnus	462	34.1	F	0.0530026	0.00551227
Ghaderi et al. (2018)	Tylenchidae	Filenchus	polyhypnus	419	40.4	F	0.0281682	0.00292949
Ghaderi et al. (2018)	Tylenchidae	Filenchus	polyhypnus	515	36.5	F	0.064079	0.00666422
Brzeski (1998)	Tylenchidae	Filenchus	sandneri	440	32	F	0.0519922	0.00540719
Ghaderi et al. (2018)	Tylenchidae	Filenchus	sandneri	383	33.5	F	0.0312886	0.00325402
Ghaderi et al. (2018)	Tylenchidae	Filenchus	sandneri	474	34.5	F	0.0559212	0.00581581
Ghaderi et al. (2018)	Tylenchidae	Filenchus	sandneri	396	36.5	F	0.0291326	0.00302979
Ghaderi et al. (2018)	Tylenchidae	Filenchus	sheri	515	35.3	F	0.0685097	0.00712501
Brzeski (1998)	Tylenchidae	Filenchus	thornei	950	39	F	0.352307	0.03664
Ghaderi et al. (2018)	Tylenchidae	Filenchus	thornei	760	37.4	F	0.196145	0.0203991
Brzeski (1998)	Tylenchidae	Filenchus	vulgaris	650	33	F	0.157613	0.0163918
Ghaderi et al. (2018)	Tylenchidae	Filenchus	vulgaris	660	38	F	0.124436	0.0129413
Ghaderi et al. (2018)	Tylenchidae	Filenchus	vulgaris	640	35	F	0.133747	0.0139097
Ghaderi et al. (2018)	Tylenchidae	Filenchus	vulgaris	626	37	F	0.111995	0.0116475
Brzeski (1998)	Tylenchidae	Irantylenchus	vicinus	820	32	F	0.336528	0.0349989
Ghaderi et al. (2018)	Tylenchidae	Irantylenchus	vicinus	921	35.8	F	0.380972	0.0396211
Ghaderi et al. (2018)	Tylenchidae	Irantylenchus	vicinus	936	36.7	F	0.380518	0.0395739
Ghaderi et al. (2018)	Tylenchidae	Irantylenchus	vicinus	803	34.7	F	0.268762	0.0279512
Ghaderi et al. (2018)	Tylenchidae	Irantylenchus	vicinus	870	31.5	F	0.414779	0.043137
Ghaderi et al. (2018)	Tylenchidae	Labrys	chinensis	583	51.3	F	0.0470599	0.00489423
Ghaderi et al. (2018)	Tylenchidae	Lelenchus	brevislitus	469	49.2	F	0.026636	0.00277014
Ghaderi et al. (2018)	Tylenchidae	Lelenchus	leptosoma	550	48.3	F	0.0445732	0.00463561
Ghaderi et al. (2018)	Tylenchidae	Lelenchus	leptosoma	571	54	F	0.0399026	0.00414987
Ghaderi et al. (2018)	Tylenchidae	Lelenchus	leptosoma	550	48.3	F	0.0445732	0.00463561
Brzeski (1998)	Tylenchidae	Malenchus	acarayensis	330	21	F	0.0509311	0.00529684
Ghaderi et al. (2018)	Tylenchidae	Malenchus	exiguus	387	23.4	F	0.0661578	0.00688041
Ghaderi et al. (2018)	Tylenchidae	Malenchus	geraerti	468	23.2	F	0.119026	0.0123787
Ghaderi et al. (2018)	Tylenchidae	Malenchus	labiatus	435	33.8	F	0.0450313	0.00468325
Ghaderi et al. (2018)	Tylenchidae	Malenchus	nanellus	446	31.4	F	0.0562374	0.00584869
Ghaderi et al. (2018)	Tylenchidae	Malenchus	undulatus	493	24.5	F	0.124764	0.0129754
Ghaderi et al. (2018)	Tylenchidae	Neopsilenchus	citri	812	34.9	F	0.274724	0.0285713
Ghaderi et al. (2018)	Tylenchidae	Neopsilenchus	magnidens	790	41	F	0.183313	0.0190646
Ghaderi et al. (2018)	Tylenchidae	Neopsilenchus	magnidens	777	38.9	F	0.193751	0.0201501
Ghaderi et al. (2018)	Tylenchidae	Neopsilenchus	magnidens	874	34.1	F	0.358844	0.0373198
Ghaderi et al. (2018)	Tylenchidae	Neothada	cancellata	619	34	F	0.128231	0.0133361
Ghaderi et al. (2018)	Tylenchidae	Psilenchus	aestuarius	903	43.4	F	0.244323	0.0254096
Ghaderi et al. (2018)	Tylenchidae	Psilenchus	aestuarius	1114	50	F	0.345617	0.0359442
Ghaderi et al. (2018)	Tylenchidae	Psilenchus	curcumerus	1004	43.6	F	0.332742	0.0346052
Brzeski (1998)	Tylenchidae	Psilenchus	hilarulus	1020	45	F	0.327533	0.0340635
Ghaderi et al. (2018)	Tylenchidae	Psilenchus	hilarulus	978	46.8	F	0.266935	0.0277612
Ghaderi et al. (2018)	Tylenchidae	Psilenchus	hilarulus	1029	43.3	F	0.363204	0.0377732
Ghaderi et al. (2018)	Tylenchidae	Psilenchus	hilarulus	1025	47.2	F	0.302112	0.0314196
Ghaderi et al. (2018)	Tylenchidae	Psilenchus	minor	906	40.8	F	0.279219	0.0290387
Ghaderi et al. (2018)	Tylenchidae	Psilenchus	minor	874	44.7	F	0.208833	0.0217186
Ghaderi et al. (2018)	Tylenchidae	Psilenchus	terextremus	802	37.2	F	0.232979	0.0242298
Ghaderi et al. (2018)	Tylenchidae	Sakia	arboris	559	56.4	F	0.0343208	0.00356936
Ghaderi et al. (2018)	Tylenchidae	Sakia	arboris	529	53.5	F	0.0323251	0.00336181
Brzeski (1998)	Tylenchidae	Tylenchus	arcuatus	790	25.2	F	0.485244	0.0504654
Ghaderi et al. (2018)	Tylenchidae	Tylenchus	arcuatus	702	32.1	F	0.209837	0.021823
Ghaderi et al. (2018)	Tylenchidae	Tylenchus	capitatus	813	32.7	F	0.314091	0.0326655
Brzeski (1998)	Tylenchidae	Tylenchus	elegans	750	29.7	F	0.298917	0.0310874
Ghaderi et al. (2018)	Tylenchidae	Tylenchus	elegans	775	27.8	F	0.37644	0.0391497
Ghaderi et al. (2018)	Tylenchidae	Tylenchus	naranensis	680	34.3	F	0.167039	0.0173721
Ghaderi et al. (2018)	Tylenchidae	Tylenchus	naranensis	715	35.4	F	0.182302	0.0189594
Ghaderi et al. (2018)	Tylenchidae	Tylenchus	ritae	758	29.2	F	0.319243	0.0332013
Ghaderi et al. (2018)	Tylenchidae	Tylenchus	ritae	785	33	F	0.277627	0.0288732
Ghaderi et al. (2018)	Tylenchidae	Tylenchus	stachys	830	28	F	0.455825	0.0474058
Ghaderi et al. (2018)	Tylenchidae	Aglenchus	agricola	606	40.5	M	0.0847984	0.00881904
Ghaderi et al. (2018)	Tylenchidae	Aglenchus	microstylus	578	42	M	0.0684171	0.00711538
Ghaderi et al. (2018)	Tylenchidae	Atetylenchus	abulbosus	1150	39.5	M	0.609227	0.0633596
Ghaderi et al. (2018)	Tylenchidae	Atetylenchus	graminis	606	38.6	M	0.0933519	0.0097086
Ghaderi et al. (2018)	Tylenchidae	Basiria	duplexa	617	39	M	0.0965176	0.0100378
Ghaderi et al. (2018)	Tylenchidae	Boleodorus	thylactus	559	42.3	M	0.0610147	0.00634553
Ghaderi et al. (2018)	Tylenchidae	Boleodorus	thylactus	544	41.3	M	0.0589898	0.00613493
Ghaderi et al. (2018)	Tylenchidae	Cephalenchus	leptus	619	44.9	M	0.0735291	0.00764703
Ghaderi et al. (2018)	Tylenchidae	Cephalenchus	lobus	636	57.1	M	0.049315	0.00512876
Ghaderi et al. (2018)	Tylenchidae	Coslenchus	assamensis	495	33.2	M	0.0687732	0.00715242
Ghaderi et al. (2018)	Tylenchidae	Coslenchus	costatus	430	24.8	M	0.0807945	0.00840263
Ghaderi et al. (2018)	Tylenchidae	Coslenchus	franklinae	500	31.8	M	0.0772566	0.00803469
Ghaderi et al. (2018)	Tylenchidae	Coslenchus	japonicus	540	36	M	0.0759375	0.0078975
Ghaderi et al. (2018)	Tylenchidae	Coslenchus	oligogyrus	464	33.2	M	0.0566445	0.00589103
Ghaderi et al. (2018)	Tylenchidae	Discopersicus	iranicus	648	43.5	M	0.0898724	0.00934673
Ghaderi et al. (2018)	Tylenchidae	Discopersicus	iranicus	663	44.4	M	0.0923963	0.00960922
Ghaderi et al. (2018)	Tylenchidae	Discotylenchus	attenuatus	377	34.4	M	0.0283	0.00294321
Ghaderi et al. (2018)	Tylenchidae	Discotylenchus	brevicaudatus	402	35.4	M	0.0324005	0.00336965
Ghaderi et al. (2018)	Tylenchidae	Discotylenchus	discretus	568	40.6	M	0.0694821	0.00722614
Ghaderi et al. (2018)	Tylenchidae	Discotylenchus	lorestanensis	483	37.8	M	0.0492876	0.00512591
Ghaderi et al. (2018)	Tylenchidae	Ecphyadophora	quadralata	771	123	M	0.0189336	0.00196909
Ghaderi et al. (2018)	Tylenchidae	Filenchus	acris	400	42	M	0.0226757	0.00235828
Ghaderi et al. (2018)	Tylenchidae	Filenchus	annulatus	377	33.2	M	0.0303828	0.00315981
Ghaderi et al. (2018)	Tylenchidae	Filenchus	aquilonius	823	36.2	M	0.265866	0.02765
Ghaderi et al. (2018)	Tylenchidae	Filenchus	cylindricaudus	560	41.5	M	0.0637306	0.00662798
Ghaderi et al. (2018)	Tylenchidae	Filenchus	discrepans	535	46	M	0.0452299	0.00470391
Ghaderi et al. (2018)	Tylenchidae	Filenchus	ditissimus	365	35.4	M	0.0242523	0.00252223
Ghaderi et al. (2018)	Tylenchidae	Filenchus	ditissimus	363	35.5	M	0.0237216	0.00246704
Ghaderi et al. (2018)	Tylenchidae	Filenchus	facultativus	410	34	M	0.0372627	0.00387532
Ghaderi et al. (2018)	Tylenchidae	Filenchus	fortis	515	37.5	M	0.0607071	0.00631353
Ghaderi et al. (2018)	Tylenchidae	Filenchus	paravesiculosus	368	33	M	0.0286019	0.0029746
Ghaderi et al. (2018)	Tylenchidae	Filenchus	polyhypnus	489	38.1	M	0.050345	0.00523588
Ghaderi et al. (2018)	Tylenchidae	Filenchus	polyhypnus	377	34.3	M	0.0284653	0.00296039
Ghaderi et al. (2018)	Tylenchidae	Filenchus	sheri	498	36	M	0.0595611	0.00619436
Ghaderi et al. (2018)	Tylenchidae	Filenchus	thornei	729	37.8	M	0.169465	0.0176243
Ghaderi et al. (2018)	Tylenchidae	Filenchus	vulgaris	635	38	M	0.110824	0.0115257
Ghaderi et al. (2018)	Tylenchidae	Filenchus	vulgaris	660	37.6	M	0.127097	0.0132181
Ghaderi et al. (2018)	Tylenchidae	Filenchus	vulgaris	597	39.5	M	0.0852332	0.00886425
Ghaderi et al. (2018)	Tylenchidae	Irantylenchus	vicinus	872	44.8	M	0.206478	0.0214737
Ghaderi et al. (2018)	Tylenchidae	Irantylenchus	vicinus	897	33.3	M	0.406789	0.042306
Ghaderi et al. (2018)	Tylenchidae	Labrys	chinensis	570	49.5	M	0.0472383	0.00491278
Ghaderi et al. (2018)	Tylenchidae	Lelenchus	leptosoma	535	50.7	M	0.0372328	0.00387221
Ghaderi et al. (2018)	Tylenchidae	Lelenchus	leptosoma	555	59	M	0.0306941	0.00319219
Ghaderi et al. (2018)	Tylenchidae	Lelenchus	leptosoma	535	50.7	M	0.0372328	0.00387221
Ghaderi et al. (2018)	Tylenchidae	Malenchus	exiguus	388	26.9	M	0.0504511	0.00524691
Ghaderi et al. (2018)	Tylenchidae	Malenchus	geraerti	437	25.8	M	0.0783583	0.00814926
Ghaderi et al. (2018)	Tylenchidae	Malenchus	labiatus	460	38.8	M	0.0404101	0.00420265
Ghaderi et al. (2018)	Tylenchidae	Malenchus	nanellus	479	37.8	M	0.0480732	0.00499961
Ghaderi et al. (2018)	Tylenchidae	Malenchus	undulatus	450	28.7	M	0.0691439	0.00719096
Ghaderi et al. (2018)	Tylenchidae	Neopsilenchus	magnidens	690	40	M	0.128324	0.0133457
Ghaderi et al. (2018)	Tylenchidae	Neopsilenchus	magnidens	665	41	M	0.10934	0.0113713
Ghaderi et al. (2018)	Tylenchidae	Neothada	cancellata	570	32.2	M	0.111633	0.0116098
Ghaderi et al. (2018)	Tylenchidae	Psilenchus	aestuarius	892	55.3	M	0.145052	0.0150854
Ghaderi et al. (2018)	Tylenchidae	Psilenchus	aestuarius	1037	44	M	0.360007	0.0374407
Ghaderi et al. (2018)	Tylenchidae	Psilenchus	curcumerus	789	42.3	M	0.171566	0.0178428
Ghaderi et al. (2018)	Tylenchidae	Psilenchus	minor	928	45.4	M	0.242333	0.0252026
Ghaderi et al. (2018)	Tylenchidae	Sakia	arboris	497	62.8	M	0.0194549	0.00202331
Ghaderi et al. (2018)	Tylenchidae	Sakia	arboris	409	60.9	M	0.0115296	0.00119908
Ghaderi et al. (2018)	Tylenchidae	Tylenchus	capitatus	748	39	M	0.171971	0.017885
Ghaderi et al. (2018)	Tylenchidae	Tylenchus	elegans	754	30.1	M	0.295707	0.0307535
Ghaderi et al. (2018)	Tylenchidae	Tylenchus	ritae	770	34.5	M	0.239725	0.0249314
Ghaderi et al. (2018)	Tylenchidae	Tylenchus	ritae	759	39.2	M	0.177842	0.0184955
Ghaderi et al. (2018)	Tylenchidae	Tylenchus	stachys	782	31	M	0.311012	0.0323452
		Aglenchus				F	0.109093
		Basiria				F	0.175565
		Boleodorus				F	0.100179
		Cephalenchus				F	0.0887455
		Coslenchus				F	0.104492
		Discopersicus				F	0.150287
		Discotylenchus				F	0.0770662
		Ecphyadophora				F	0.0295778
		Eutylenchus				F	0.282623
		Filenchus				F	0.0972633
		Irantylenchus				F	0.356312
		Labrys				F	0.0470599
		Lelenchus				F	0.0389212
		Melnchus				F	0.0770246
		Neopsilenchus				F	0.252658
		Neothada				F	0.128231
		Sakia				F	0.0333229
		Tylenchus				F	0.308657
		Tylenchidae					0.136504
		Atetylenchus				F	0.450919
		Psilenchus				F	0.29035
		Psilenchidae					0.370635
		Aglenchus				M	0.0766078
		Basiria				M	0.0965176
		Boleodorus				M	0.0600022
		Cephalenchus				M	0.0614221
		Coslenchus				M	0.0718813
		Discopersicus				M	0.0911344
		Discotylenchus				M	0.0448676
		Ecphyadophora				M	0.0189336
		Eutylenchus				M
		Filenchus				M	0.0725542
		Irantylenchus				M	0.306633
		Labrys				M	0.0472383
		Lelenchus				M	0.0350532
		Melnchus				M	0.0572873
		Neopsilenchus				M	0.118832
		Neothada				M	0.111633
		Sakia				M	0.0154923
		Tylenchus				M	0.239251
							0.0897259
		Atetylenchus				M	0.35129
		Psilenchus				M	0.229739
							0.290515

## Sheet: Pratylenchidae
Source	Family	Genus	Species	L	a	Life stage	Wfresh	Wdry
Original description	Pratylenchidae	Apratylenchoides	belli	540	30	F	0.10935	0.0113724
Original description	Pratylenchidae	Apratylenchoides	homoglans	580	29.3	F	0.142046	0.0147728
Original description	Pratylenchidae	Apratylenchus	vietnamensis	421	18.3	F	0.139259	0.014483
Original description	Pratylenchidae	Apratylenchus	vietnamensis	349	17.7	F	0.0848027	0.00881948
Ghaderi et al. (2018)	Pratylenchidae	Hirschmanniella	anchoryzae	1620	69.5	F	0.550117	0.0572122
Original description	Pratylenchidae	Hirschmanniella	belli	1870	67	F	0.910448	0.0946866
Original description	Pratylenchidae	Hirschmanniella	caudacrena	1410	53	F	0.623714	0.0648663
Original description	Pratylenchidae	Hirschmanniella	diversa	2400	65	F	2.04497	0.212677
Ghaderi et al. (2018)	Pratylenchidae	Hirschmanniella	gracilis	1920	63.2	F	1.10751	0.115182
Original description	Pratylenchidae	Hirschmanniella	gracilis	1810	59	F	1.06466	0.110725
Original description	Pratylenchidae	Hirschmanniella	gracilis	2000	58	F	1.48633	0.154578
Original description	Pratylenchidae	Hirschmanniella	gracilis	1770	58	F	1.03025	0.107146
Original description	Pratylenchidae	Hirschmanniella	imamuri	2440	70	F	1.85291	0.192702
Original description	Pratylenchidae	Hirschmanniella	loofi	2360	56	F	2.61963	0.272442
Original description	Pratylenchidae	Hirschmanniella	loofi	2240	55	F	2.3222	0.241508
Original description	Pratylenchidae	Hirschmanniella	marina	2150	65	F	1.47017	0.152898
Original description	Pratylenchidae	Hirschmanniella	microtyla	1210	43	F	0.598824	0.0622777
Original description	Pratylenchidae	Hirschmanniella	mucronata	1890	54	F	1.44703	0.150491
Original description	Pratylenchidae	Hirschmanniella	mucronata	2000	62	F	1.30073	0.135276
Original description	Pratylenchidae	Hirschmanniella	mucronata	2170	57	F	1.96567	0.204429
Original description	Pratylenchidae	Hirschmanniella	oryzae	1440	60	F	0.5184	0.0539136
Original description	Pratylenchidae	Hirschmanniella	oryzae	1300	57	F	0.42263	0.0439535
Original description	Pratylenchidae	Hirschmanniella	spinicaudata	2220	53	F	2.43437	0.253175
Original description	Pratylenchidae	Hirschmanniella	spinicaudata	2730	54	F	4.36094	0.453538
Original description	Pratylenchidae	Hirschmanniella	spinicaudata	2990	56	F	5.32743	0.554052
Original description	Pratylenchidae	Hirschmanniella	spinicaudata	3170	60	F	5.53038	0.57516
Original description	Pratylenchidae	Hirschmanniella	spinicaudata	3420	63	F	6.29908	0.655104
Original description	Pratylenchidae	Hirschmanniella	thornei	2270	64	F	1.78483	0.185623
Brzeski (1998)	Pratylenchidae	Hoplotylus	femina	590	27	F	0.176079	0.0183123
Original description	Pratylenchidae	Hoplotylus	femina	664	23.1	F	0.342894	0.035661
Original description	Pratylenchidae	Hoplotylus	femina	536	26.2	F	0.140208	0.0145816
Original description	Pratylenchidae	Hoplotylus	femina	584	28.3	F	0.155434	0.0161651
Original description	Pratylenchidae	Hoplotylus	femina	603	29.9	F	0.153281	0.0159413
Original description	Pratylenchidae	Hoplotylus	femina	511	24.6	F	0.137807	0.014332
Original description	Pratylenchidae	Hoplotylus	femina	520	25.7	F	0.133053	0.0138375
Original description	Pratylenchidae	Hoplotylus	silvaticus	493	21.6	F	0.160514	0.0166935
Original description	Pratylenchidae	Hoplotylus	sjacobi	547	27.3	F	0.137251	0.0142741
Original description	Pratylenchidae	Hoplotylus	triversus	422	23.7	F	0.083622	0.00869669
Castillo & Vovlas (2007)	Pratylenchidae	Pratylenchus	acuticaudatus	510	30	F	0.0921187	0.00958035
Castillo & Vovlas (2007)	Pratylenchidae	Pratylenchus	alleni	380	23	F	0.0648299	0.00674231
Ghaderi et al. (2018)	Pratylenchidae	Pratylenchus	alleni	476	26	F	0.0997136	0.0103702
Castillo & Vovlas (2007)	Pratylenchidae	Pratylenchus	angulatus	360	30	F	0.0324	0.0033696
Castillo & Vovlas (2007)	Pratylenchidae	Pratylenchus	arlingtoni	460	27	F	0.0834499	0.00867879
Castillo & Vovlas (2007)	Pratylenchidae	Pratylenchus	artemisiae	560	24.3	F	0.18588	0.0193315
Castillo & Vovlas (2007)	Pratylenchidae	Pratylenchus	bhattii	480	28	F	0.0881633	0.00916898
Castillo & Vovlas (2007)	Pratylenchidae	Pratylenchus	brachyurus	560	20	F	0.2744	0.0285376
Castillo & Vovlas (2007)	Pratylenchidae	Pratylenchus	brachyurus	550	21	F	0.235792	0.0245224
Castillo & Vovlas (2007)	Pratylenchidae	Pratylenchus	coffeae	530	23.7	F	0.165657	0.0172284
Ghaderi et al. (2018)	Pratylenchidae	Pratylenchus	coffeae	515	27	F	0.117105	0.0121789
Brzeski (1998)	Pratylenchidae	Pratylenchus	crenatus	470	25	F	0.103823	0.0107976
Castillo & Vovlas (2007)	Pratylenchidae	Pratylenchus	crenatus	500	21	F	0.177154	0.018424
Ghaderi et al. (2018)	Pratylenchidae	Pratylenchus	delattrei	543	23.8	F	0.176655	0.0183721
Ghaderi et al. (2018)	Pratylenchidae	Pratylenchus	delattrei	508	22.6	F	0.160418	0.0166835
Ghaderi et al. (2018)	Pratylenchidae	Pratylenchus	delattrei	471	23	F	0.123449	0.0128387
Castillo & Vovlas (2007)	Pratylenchidae	Pratylenchus	dunensis	510	28.3	F	0.103518	0.0107659
Ghaderi et al. (2018)	Pratylenchidae	Pratylenchus	ekrami	536	31.2	F	0.0988702	0.0102825
Castillo & Vovlas (2007)	Pratylenchidae	Pratylenchus	elamini	410	28	F	0.0549434	0.00571411
Castillo & Vovlas (2007)	Pratylenchidae	Pratylenchus	elamini	440	27	F	0.0730316	0.00759528
Brzeski (1998)	Pratylenchidae	Pratylenchus	fallax	490	24.5	F	0.1225	0.01274
Castillo & Vovlas (2007)	Pratylenchidae	Pratylenchus	fallax	490	29	F	0.0874324	0.00909297
Brzeski (1998)	Pratylenchidae	Pratylenchus	flakkensis	480	25	F	0.110592	0.0115016
Castillo & Vovlas (2007)	Pratylenchidae	Pratylenchus	goodeyi	520	25.4	F	0.136214	0.0141663
Castillo & Vovlas (2007)	Pratylenchidae	Pratylenchus	goodeyi	560	23.9	F	0.192153	0.019984
Castillo & Vovlas (2007)	Pratylenchidae	Pratylenchus	hexincisus	430	22.6	F	0.0972901	0.0101182
Ghaderi et al. (2018)	Pratylenchidae	Pratylenchus	jaehni	470	24.2	F	0.110801	0.0115233
Castillo & Vovlas (2007)	Pratylenchidae	Pratylenchus	loosi	580	32	F	0.119087	0.012385
Ghaderi et al. (2018)	Pratylenchidae	Pratylenchus	loosi	530	31	F	0.0968243	0.0100697
Ghaderi et al. (2018)	Pratylenchidae	Pratylenchus	loosi	534	30.1	F	0.105044	0.0109246
Castillo & Vovlas (2007)	Pratylenchidae	Pratylenchus	mediterraneus	510	27	F	0.113727	0.0118276
Castillo & Vovlas (2007)	Pratylenchidae	Pratylenchus	neglectus	430	22.5	F	0.0981568	0.0102083
Castillo & Vovlas (2007)	Pratylenchidae	Pratylenchus	neglectus	600	24	F	0.234375	0.024375
Castillo & Vovlas (2007)	Pratylenchidae	Pratylenchus	neglectus	410	23.1	F	0.0807249	0.00839539
Ghaderi et al. (2018)	Pratylenchidae	Pratylenchus	neglectus	455	27	F	0.0807582	0.00839885
Ghaderi et al. (2018)	Pratylenchidae	Pratylenchus	neglectus	488	25.7	F	0.10997	0.0114369
Ghaderi et al. (2018)	Pratylenchidae	Pratylenchus	neglectus	455	25.8	F	0.0884453	0.00919831
Ghaderi et al. (2018)	Pratylenchidae	Pratylenchus	neglectus	455	25.2	F	0.0927071	0.00964154
Ghaderi et al. (2018)	Pratylenchidae	Pratylenchus	neglectus	562	32.8	F	0.10312	0.0107244
Ghaderi et al. (2018)	Pratylenchidae	Pratylenchus	neglectus	468	22.2	F	0.129991	0.013519
Ghaderi et al. (2018)	Pratylenchidae	Pratylenchus	neglectus	496	27.2	F	0.103083	0.0107206
Ghaderi et al. (2018)	Pratylenchidae	Pratylenchus	neglectus	583	30.7	F	0.131404	0.013666
Ghaderi et al. (2018)	Pratylenchidae	Pratylenchus	neglectus	474	23.3	F	0.122604	0.0127508
Ghaderi et al. (2018)	Pratylenchidae	Pratylenchus	neglectus	463	25.2	F	0.0976837	0.0101591
Brzeski (1998)	Pratylenchidae	Pratylenchus	penetrans	530	25.6	F	0.14198	0.0147659
Castillo & Vovlas (2007)	Pratylenchidae	Pratylenchus	penetrans	530	25.4	F	0.144225	0.0149994
Castillo & Vovlas (2007)	Pratylenchidae	Pratylenchus	penetrans	520	24	F	0.152569	0.0158672
Ghaderi et al. (2018)	Pratylenchidae	Pratylenchus	penetrans	602	33.7	F	0.120063	0.0124866
Brzeski (1998)	Pratylenchidae	Pratylenchus	pratensis	460	26	F	0.0899926	0.00935923
Ghaderi et al. (2018)	Pratylenchidae	Pratylenchus	pseudocoffeae	465	26.7	F	0.0881488	0.00916747
Brzeski (1998)	Pratylenchidae	Pratylenchus	pseudopratensis	450	25	F	0.091125	0.009477
Castillo & Vovlas (2007)	Pratylenchidae	Pratylenchus	pseudopratensis	380	25	F	0.054872	0.00570669
Castillo & Vovlas (2007)	Pratylenchidae	Pratylenchus	pseudopratensis	440	24	F	0.0924306	0.00961278
Ghaderi et al. (2018)	Pratylenchidae	Pratylenchus	pseudopratensis	508	25.7	F	0.124052	0.0129014
Brzeski (1998)	Pratylenchidae	Pratylenchus	silvaticus	450	25	F	0.091125	0.009477
Brzeski (1998)	Pratylenchidae	Pratylenchus	thornei	550	30	F	0.115538	0.012016
Castillo & Vovlas (2007)	Pratylenchidae	Pratylenchus	thornei	650	31	F	0.178606	0.0185751
Ghaderi et al. (2018)	Pratylenchidae	Pratylenchus	thornei	550	31	F	0.108204	0.0112533
Ghaderi et al. (2018)	Pratylenchidae	Pratylenchus	thornei	529	33.5	F	0.0824437	0.00857414
Ghaderi et al. (2018)	Pratylenchidae	Pratylenchus	thornei	691	35.2	F	0.166429	0.0173086
Ghaderi et al. (2018)	Pratylenchidae	Pratylenchus	thornei	609	40.9	F	0.0843889	0.00877644
Ghaderi et al. (2018)	Pratylenchidae	Pratylenchus	thornei	621	32.1	F	0.14526	0.015107
Ghaderi et al. (2018)	Pratylenchidae	Pratylenchus	thornei	606	33.9	F	0.121032	0.0125873
Ghaderi et al. (2018)	Pratylenchidae	Pratylenchus	thornei	466	24.3	F	0.107109	0.0111393
Ghaderi et al. (2018)	Pratylenchidae	Pratylenchus	thornei	651	33.3	F	0.155501	0.0161722
Ghaderi et al. (2018)	Pratylenchidae	Pratylenchus	unzenesis	547	29.3	F	0.119153	0.012392
Castillo & Vovlas (2007)	Pratylenchidae	Pratylenchus	ventroprojectus	440	30.1	F	0.0587631	0.00611137
Castillo & Vovlas (2007)	Pratylenchidae	Pratylenchus	vulnus	630	31.3	F	0.159519	0.01659
Castillo & Vovlas (2007)	Pratylenchidae	Pratylenchus	vulnus	620	33	F	0.136781	0.0142253
Ghaderi et al. (2018)	Pratylenchidae	Pratylenchus	vulnus	540	33	F	0.0903719	0.00939868
Ghaderi et al. (2018)	Pratylenchidae	Pratylenchus	vulnus	493	32	F	0.0731343	0.00760596
Castillo & Vovlas (2007)	Pratylenchidae	Pratylenchus	zeae	540	27	F	0.135	0.01404
Castillo & Vovlas (2007)	Pratylenchidae	Pratylenchus	zeae	520	21.1	F	0.19739	0.0205286
Castillo & Vovlas (2007)	Pratylenchidae	Pratylenchus	zeae	530	25	F	0.148877	0.0154832
Castillo & Vovlas (2007)	Pratylenchidae	Pratylenchus	zeae	500	29.2	F	0.0916272	0.00952923
Castillo & Vovlas (2007)	Pratylenchidae	Pratylenchus	zeae	480	25.7	F	0.10465	0.0108836
Brzeski (1998)	Pratylenchidae	Pratylenchus	neglectus	430	24	F	0.0862706	0.00897214
Original description	Pratylenchidae	Radopholus	allius	450	29	F	0.0677207	0.00704295
Original description	Pratylenchidae	Radopholus	arabocoffeae	615	29.9	F	0.162616	0.0169121
Original description	Pratylenchidae	Radopholus	brassicae	442	23.5	F	0.0977262	0.0101635
Original description	Pratylenchidae	Radopholus	duriophilus	603	26.3	F	0.198116	0.0206041
Original description	Pratylenchidae	Radopholus	duriophilus	588	30.5	F	0.136588	0.0142051
Original description	Pratylenchidae	Radopholus	duriophilus	669	29.7	F	0.212151	0.0220637
Original description	Pratylenchidae	Radopholus	inaequalis	640	25	F	0.262144	0.027263
Original description	Pratylenchidae	Radopholus	neosimilis	660	30	F	0.19965	0.0207636
Original description	Pratylenchidae	Radopholus	similis	690	27	F	0.281644	0.0292909
Original description	Pratylenchidae	Radopholus	similis	680	26	F	0.29071	0.0302338
Ghaderi et al. (2018)	Pratylenchidae	Radopholus	sp.	675	29.5	F	0.220875	0.022971
Original description	Pratylenchidae	Radopholus	vangundyi	540	27	F	0.135	0.01404
Original description	Pratylenchidae	Radopholus	williamsi	420	21	F	0.105	0.01092
Original description	Pratylenchidae	Zygotylenchus	guansuensis	522	27.5	F	0.117551	0.0122253
Brzeski (1998)	Pratylenchidae	Zygotylenchus	guevarai	580	29	F	0.145	0.01508
Ghaderi et al. (2018)	Pratylenchidae	Zygotylenchus	guevarai	564	27.8	F	0.145087	0.015089
Ghaderi et al. (2018)	Pratylenchidae	Zygotylenchus	guevarai	593	26.3	F	0.188422	0.0195959
Ghaderi et al. (2018)	Pratylenchidae	Zygotylenchus	guevarai	555	27.8	F	0.138251	0.0143781
Ghaderi et al. (2018)	Pratylenchidae	Zygotylenchus	guevarai	603	30.1	F	0.151251	0.0157301
Ghaderi et al. (2018)	Pratylenchidae	Zygotylenchus	guevarai	718	33.6	F	0.204915	0.0213112
Ghaderi et al. (2018)	Pratylenchidae	Zygotylenchus	guevarai	614	30.1	F	0.159681	0.0166068
Ghaderi et al. (2018)	Pratylenchidae	Zygotylenchus	guevarai	539	27.5	F	0.129414	0.013459
Original description	Pratylenchidae	Zygotylenchus	guevarai	510	27.9	F	0.106508	0.0110768
Original description	Pratylenchidae	Zygotylenchus	guevarai	510	28.5	F	0.102071	0.0106153
Original description	Pratylenchidae	Zygotylenchus	taomasinae	725	36	F	0.183776	0.0191127
Original description	Pratylenchidae	Zygradus	nigeriensis	590	29	F	0.15263	0.0158735
Original description	Pratylenchidae	Zygradus	rector	550	38	F	0.0720113	0.00748918
Original description	Pratylenchidae	Aschlysiella	magniglans	530	27	immature F	0.127638	0.0132744
Original description	Pratylenchidae	Aschlysiella	trilineatus	590	31	immature F	0.133571	0.0138914
Original description	Pratylenchidae	Aschlysiella	williamsi	410	25.8	immature F	0.0647131	0.00673016
Original description	Pratylenchidae	Nacobbus	aberrans	810	35	immature F	0.271143	0.0281989
Original description	Pratylenchidae	Nacobbus	dorsalis	820	30	immature F	0.382894	0.039821
Original description	Pratylenchidae	Apratylenchoides	belli	510	30	M	0.0921187	0.00958035
Original description	Pratylenchidae	Apratylenchoides	homoglans	560	35.4	M	0.0875866	0.009109
Original description	Pratylenchidae	Apratylenchus	vietnamensis	392	23.1	M	0.0705528	0.00733749
Original description	Pratylenchidae	Aschlysiella	williamsi	390	27.6	M	0.0486694	0.00506161
Ghaderi et al. (2018)	Pratylenchidae	Hirschmanniella	anchoryzae	1905	72	M	0.833489	0.0866829
Original description	Pratylenchidae	Hirschmanniella	belli	1680	70	M	0.6048	0.0628992
Original description	Pratylenchidae	Hirschmanniella	caudacrena	1360	52	M	0.58142	0.0604677
Original description	Pratylenchidae	Hirschmanniella	diversa	2020	70	M	1.05133	0.109338
Ghaderi et al. (2018)	Pratylenchidae	Hirschmanniella	gracilis	1810	71	M	0.735189	0.0764597
Original description	Pratylenchidae	Hirschmanniella	gracilis	1770	60	M	0.962714	0.100122
Original description	Pratylenchidae	Hirschmanniella	gracilis	1870	59	M	1.17409	0.122105
Original description	Pratylenchidae	Hirschmanniella	gracilis	1630	54	M	0.928229	0.0965359
Original description	Pratylenchidae	Hirschmanniella	imamuri	2350	77	M	1.36805	0.142277
Original description	Pratylenchidae	Hirschmanniella	loofi	2100	52	M	2.14058	0.22262
Original description	Pratylenchidae	Hirschmanniella	loofi	1940	53	M	1.62455	0.168953
Original description	Pratylenchidae	Hirschmanniella	marina	1530	60	M	0.621802	0.0646674
Original description	Pratylenchidae	Hirschmanniella	microtyla	1140	37	M	0.676381	0.0703436
Original description	Pratylenchidae	Hirschmanniella	mucronata	1760	54	M	1.1685	0.121524
Original description	Pratylenchidae	Hirschmanniella	mucronata	1860	57	M	1.23785	0.128737
Original description	Pratylenchidae	Hirschmanniella	mucronata	1930	57	M	1.38294	0.143825
Original description	Pratylenchidae	Hirschmanniella	oryzae	1170	59	M	0.287563	0.0299066
Original description	Pratylenchidae	Hirschmanniella	oryzae	1100	57	M	0.25604	0.0266282
Original description	Pratylenchidae	Hirschmanniella	spinicaudata	2300	64	M	1.85654	0.19308
Original description	Pratylenchidae	Hirschmanniella	spinicaudata	2400	59	M	2.48205	0.258133
Original description	Pratylenchidae	Hirschmanniella	spinicaudata	2630	64	M	2.77579	0.288683
Original description	Pratylenchidae	Hirschmanniella	spinicaudata	2720	60	M	3.49369	0.363344
Original description	Pratylenchidae	Hirschmanniella	spinicaudata	2840	67	M	3.18923	0.33168
Original description	Pratylenchidae	Hirschmanniella	thornei	2100	65	M	1.36997	0.142477
Original description	Pratylenchidae	Hoplotylus	femina	580	44	M	0.0629881	0.00655076
Original description	Pratylenchidae	Hoplotylus	femina	491	39.6	M	0.0471774	0.00490645
Original description	Pratylenchidae	Hoplotylus	femina	450	37	M	0.041602	0.00432661
Original description	Pratylenchidae	Hoplotylus	femina	369	36	M	0.02423	0.00251992
Original description	Pratylenchidae	Hoplotylus	femina	391	32.1	M	0.0362577	0.0037708
Original description	Pratylenchidae	Hoplotylus	silvaticus	423	30.8	M	0.0498654	0.00518601
Original description	Pratylenchidae	Hoplotylus	sjacobi	462	29.8	M	0.0694022	0.00721783
Original description	Pratylenchidae	Hoplotylus	triversus	415	29.4	M	0.0516808	0.00537481
Original description	Pratylenchidae	Nacobbus	aberrans	1000	32	M	0.610352	0.0634766
Original description	Pratylenchidae	Nacobbus	dorsalis	950	33	M	0.492066	0.0511748
Castillo & Vovlas (2007)	Pratylenchidae	Pratylenchus	alleni	370	26	M	0.0468315	0.00487048
Ghaderi et al. (2018)	Pratylenchidae	Pratylenchus	alleni	369	28	M	0.0400537	0.00416559
Castillo & Vovlas (2007)	Pratylenchidae	Pratylenchus	artemisiae	520	26.2	M	0.128023	0.0133144
Castillo & Vovlas (2007)	Pratylenchidae	Pratylenchus	bhattii	420	28	M	0.0590625	0.0061425
Castillo & Vovlas (2007)	Pratylenchidae	Pratylenchus	coffeae	480	27.4	M	0.0920667	0.00957494
Ghaderi et al. (2018)	Pratylenchidae	Pratylenchus	coffeae	445	30	M	0.0611952	0.0063643
Castillo & Vovlas (2007)	Pratylenchidae	Pratylenchus	dunensis	450	28.7	M	0.0691439	0.00719096
Ghaderi et al. (2018)	Pratylenchidae	Pratylenchus	ekrami	536	33	M	0.0883785	0.00919136
Castillo & Vovlas (2007)	Pratylenchidae	Pratylenchus	fallax	440	27	M	0.0730316	0.00759528
Castillo & Vovlas (2007)	Pratylenchidae	Pratylenchus	goodeyi	540	26.5	M	0.140142	0.0145748
Castillo & Vovlas (2007)	Pratylenchidae	Pratylenchus	goodeyi	490	27.8	M	0.0951434	0.00989491
Castillo & Vovlas (2007)	Pratylenchidae	Pratylenchus	hexincisus	400	31	M	0.0416233	0.00432882
Ghaderi et al. (2018)	Pratylenchidae	Pratylenchus	jaehni	505	28.8	M	0.0970441	0.0100926
Castillo & Vovlas (2007)	Pratylenchidae	Pratylenchus	loosi	460	35	M	0.0496612	0.00516477
Ghaderi et al. (2018)	Pratylenchidae	Pratylenchus	loosi	440	41	M	0.0316716	0.00329385
Ghaderi et al. (2018)	Pratylenchidae	Pratylenchus	loosi	449	31.4	M	0.0573799	0.00596751
Castillo & Vovlas (2007)	Pratylenchidae	Pratylenchus	mediterraneus	480	31	M	0.0719251	0.00748021
Ghaderi et al. (2018)	Pratylenchidae	Pratylenchus	pseudocoffeae	448	29.3	M	0.0654604	0.00680788
Castillo & Vovlas (2007)	Pratylenchidae	Pratylenchus	pseudopratensis	390	28	M	0.0472887	0.00491803
Brzeski (1998)	Pratylenchidae	Pratylenchus	silvaticus	370	27	M	0.0434268	0.00451639
Ghaderi et al. (2018)	Pratylenchidae	Pratylenchus	thornei	580	36.3	M	0.0925445	0.00962463
Ghaderi et al. (2018)	Pratylenchidae	Pratylenchus	thornei	520	32	M	0.0858203	0.00892531
Ghaderi et al. (2018)	Pratylenchidae	Pratylenchus	unzenesis	482	27.2	M	0.0945983	0.00983822
Castillo & Vovlas (2007)	Pratylenchidae	Pratylenchus	ventroprojectus	390	31.1	M	0.0383313	0.00398645
Castillo & Vovlas (2007)	Pratylenchidae	Pratylenchus	vulnus	540	32.4	M	0.09375	0.00975
Castillo & Vovlas (2007)	Pratylenchidae	Pratylenchus	vulnus	570	33	M	0.106286	0.0110538
Ghaderi et al. (2018)	Pratylenchidae	Pratylenchus	vulnus	508	37	M	0.0598505	0.00622445
Ghaderi et al. (2018)	Pratylenchidae	Pratylenchus	vulnus	470	32.5	M	0.0614337	0.00638911
Original description	Pratylenchidae	Radopholus	arabocoffeae	571	33	M	0.106847	0.011112
Original description	Pratylenchidae	Radopholus	duriophilus	614	34.3	M	0.122969	0.0127888
Original description	Pratylenchidae	Radopholus	duriophilus	652	37	M	0.126538	0.0131599
Original description	Pratylenchidae	Radopholus	duriophilus	647	36.7	M	0.125678	0.0130706
Original description	Pratylenchidae	Radopholus	inaequalis	590	30	M	0.142624	0.0148329
Original description	Pratylenchidae	Radopholus	neosimilis	560	31	M	0.114214	0.0118783
Original description	Pratylenchidae	Radopholus	similis	630	35	M	0.127575	0.0132678
Original description	Pratylenchidae	Radopholus	similis	620	35	M	0.121596	0.012646
Ghaderi et al. (2018)	Pratylenchidae	Radopholus	sp.	600	33.3	M	0.121743	0.0126613
Original description	Pratylenchidae	Radopholus	vangundyi	520	31	M	0.0914464	0.00951043
Original description	Pratylenchidae	Radopholus	williamsi	410	25	M	0.068921	0.00716778
Ghaderi et al. (2018)	Pratylenchidae	Zygotylenchus	guevarai	514	28.1	M	0.107487	0.0111787
Ghaderi et al. (2018)	Pratylenchidae	Zygotylenchus	guevarai	533	31	M	0.0984778	0.0102417
Original description	Pratylenchidae	Zygotylenchus	guevarai	540	30.5	M	0.105794	0.0110026
Original description	Pratylenchidae	Zygotylenchus	guevarai	510	33	M	0.0761312	0.00791764
Original description	Pratylenchidae	Zygotylenchus	taomasinae	625	40.5	M	0.0930272	0.00967483
Original description	Pratylenchidae	Zygradus	rector	530	39.6	M	0.0593359	0.00617093
Original description	Pratylenchidae	Aschlysiella	williamsi	790	8.8	mature F	3.9792	0.413837
Original description	Pratylenchidae	Nacobbus	aberrans	1100	4	mature F	51.9922	5.40719
Original description	Pratylenchidae	Nacobbus	dorsalis	1450	2	mature F	476.348	49.5402
		Apratylenchoides				F	0.125698
		Apratylenchus				F	0.112031
		Aschlysiella				F (immature)	0.108641
		Hirschmanniella				F	2.04472
		Hoplotylus				F	0.162014
		Nacobbus				F (immature)	0.327019
		Pratylenchus				F	0.118606
		Radopholus				F	0.182303
		Zygotylenchus				F	0.147661
		Zygradus				F	0.112321
		all					0.344101
		common-small					0.133659
		Hirschmanniella					2.04472
		Nacobbus					0.327019
		Apratylenchoides				M	0.0898527
		Apratylenchus				M	0.0705528
		Aschlysiella				M	0.0486694
		Hirschmanniella				M	1.36678
		Hoplotylus				M	0.0479005
		Nacobbus				M	0.551209
		Pratylenchus				M	0.0725417
		Radopholus				M	0.115468
		Zygotylenchus				M	0.0961835
		Zygradus				M	0.0593359
		all				M	0.25185
		common-small				M	0.0750631
		Hirschmanniella				M	1.36678
		Nacobbus				M	0.551209
		Aschlysiella				F (mature)	3.9792
		Nacobbus				F (mature)	264.17

[truncated: 10 more sheets: Trichodoridae, Meloidogynidae, Longidoridae, Hoplolaimidae, Criconematidae, Anguinidae, Merliniidae, Belonolaimidae, Heteroderinae, Aphelenchidae]
